# Supplementary material for: A biogeographic framework of octopod species diversification: the role of the Isthmus of Panama
Source: PeerJ journal article supplement (doi:10.7717/peerj.8691), 2020-03-27
Supplement: SUPPLEMENTAL_S1_16S.pdf [file SUPPLEMENTAL_S1_16S.pdf]

>383

AACAGCTGCGGTATTATAACTGTAAGGTAGCATAATAATTTGCCTTGTAATTAAGGCTAGAATG  
AATGGTTTGACGAAAATTAAGCTGTCTCTAATTTATTTGTTAGAAATTAATTTTTATAGTGAAAAAGC  
TTGGATAATTTAAAGGGACGAGAAGACCCTATTGAGCTTTAATAATATATTTTGATTGGGGTGATCAA  
GGAATAAACTTCCTTATTAATTGAGTAATAAACCAAAGTTTTTGCTTATAAGATAAGTTACCATAGG  
GGTAACAGCGTAATTTTTTTTTGAGAGTTCATATTGAAAAAGAGATTGCGACCTCGATGTTGGATTAA  
AATACCTTAAGGTGAAGAGGCTTTATTAGGTGAATCTGTTTCGATTTTTAAAATTTT

>384

AACAGCTGCGGTATTATAACTGTAAGGTAGCATAATAATTTGCCTTGTAATTAAGGCTAGAATG  
AATGGTTTGACGAAAATTAAGCTGTCTCTAATTTATTTGTTAGAAATTAATTTTTATAGTGAAAAAGC  
TTGGATAGTTTAAAGGGACGAGAAGACCCTATTGAGCTTTAATAATATATTTTGATTGGGGGGATCAA  
GGAATAAACTTCCTTATTAATTGAGTAATAAACCAAAGTTTTTGCTTATAAGATAAGTTACCATAGG  
GGTAACAGCGTAATTTTTTTTTGAGAGTTCATATTGAAAAAGAGATTGCGACCTCGATGTTGGATTAA  
AATACCTTAAGGTGAAGAGGCTTTATTAGGTGAATCTGTTTCGATTTTTAAAATTTT

>385

AACAGCTGCGGTATTATAACTGTAAGGTAGCATAATAATTTGCCTTGTAATTAAGGCTAGAATG  
AATGGTTTGACGAAAATTAAGCTGTCTCTAATTTATTTGTTAGAAATTAATTTTTATAGTGAAAAAGC  
TTGGATAGTTTAAAGGGACGAGAAGACCCTATTGAGCTTTAATAATATATTTTGATTGGGGTGATCAA  
GGAATAAACTTCCTTATTAATTGAGTAATAAACCAAAGTTTTTGCTTATAAGATAAGTTACCATAGG  
GGTAACAGCGTAATTTTTTTTTGAGAGTTCATATTGAAAAAGAGATTGCGACCTCGATGTTGGATTAA  
AATACCTTAAGGTGAAGAGGCTTTATTAGGTGAATCTGTTTCGATTTTTAAAATTTT

>386

AACAGCTGCGGTATTATAACTGTAAGGTAGCATAATAATTTGCCTTGTAATTAAGGCTAGAATG  
AATGGTTTGACGAAAATTAAGCTGTCTCTAATTTATTTGTTAGAAATTAATTTTTATAGTGAAAAAGC  
TTGGATAGTTTAAAGGGACGAGAAGACCCTATTGAGCTTTAATAATATATTTTGATTGGGGTGATCAA  
GGAATAAACTTCCTTATTAATTGAGTAATAAACCAAAGTTTTTGCTTATAAGATAAGTTACCATAGG  
GGTAACAGCGTAATTTTTTTTTGAGAGTTCATATTGAAAAAGAGATTGCGACCTCGATGTTGGATTAA  
AATACCTTAAGGTGAAGAGGCTTTATTAGGTGAATCTGTTTCGATTTTTAAAATTTT

>bimaculatus

AACAGCTGCGGTATTATAACTGTAAGGTAGCATAATAATTTGCTCTATAAATTGGGGCTAGAATG  
AATGGTTTGACGAAAATTTAACTGTCTCTATTTTATTTATTAGAAATTAATTTTTATAGTGAGAAAAGC  
TTAAATTGTTTAAAGGGACGAAAAGACCCTATTGAGCTTTATTAATTTATTTTGTTGGGGTGATCAA  
GGAATAAACTTCCTTATTTTTGGAAAAATAAACCAAGTTTTTTGCTTAGAAGATAAGTTACCATAGG  
GATAACAGCGTAATTTTTTTTTGAGAGTTCGATTGAAAAAGAGATTGCGACCTCGATGTTGGATTAA  
AAAACCTTAAGGTGTAGAGGCTTTGTTAGGTAAATCTGTTTCGATTTTTAAAATTTT

>bimaculoides1

AACAGCTGCGGTATTATAACTGTAAGGTAGCATAGTAATTTGCTCTATAAATTGGGGCTAGAATG  
AATGGTTTGACGAAAATTTAACTGTCTCTATTTTATTTATTAGAAATTAATTTTTATAGTGAAAAAGC  
TTAAATTATTTAAAGGGACGAAAAGACCCTATTGAGCTTTATTAATTTATTTTGATTGGGGTGATCAA  
GGAATAAACTTCCTTATTTTTGGAAAAATAAACCAAGTTTTTTGCTTAGAAGATAAGTTACCATAGG  
GATAACAGCGTAATTTTTTTTTGAGAGTTCATATTGAAAAAGGAGATTGCGACCTCGATGTTGGATTAA  
AAAACCTTAAGGTGTAGAGGCTTTATTAGGTAAATCTGTTTCGATTTTTAAAATTTT

>bimaculoides2

AACAGCTGCGGTATTATAACTGTAAGGTAGCATAGTAATTTGCTCTATAAATTGGGGCTAGAATG  
AATGGTTTGACGAAAATTTAACTGTCTCTATTTTATTTATTAGAAATTAATTTTTATAGTGAAAAAGC  
TTAAATTATTTAAAGGGACGAAAAGACCCTATTGAGCTTTATTAATTTATTTTGATTGGGGTGATCAA  
GGAATAAACTTCCTTATTTTTGGAAAAATAAACCAAGTTTTTTGCTTAGAAGATAAGTTACCATAGG  
GATAACAGCGTAATTTTTTTTTGAGAGTTCATATTGAAAAAGGAGATTGCGACCTCGATGTTGGATTAA  
AAAACCTTAAGGTGTAGAGGCTTTATTAGGTAAATCTGTTTCGATTTTTAAAATTTT

>defilippi1

AACAGCTGCGGTATTATAACTGTAAGGTAGCATAATAATTTGCTCTATAAATTAGGGCTAGAATG  
AATGGTTTGACGAGAATTTAACTGTCTCTACTTTATTTGTTAGAAATTAATTTTTATAGTGAAAAAGC  
TTGGATGGTTTAAAGGGACGAAAAGACCCTATTGAGCTTTAATAATTTAATTTGGTTGGGGTGATCAA  
GGAATAAACTTCCTTATTAATGGGTTAATAAACCAAGTTTTTTGCTTATAAGGTAAGTTACCATAGG

GATAACAGCGTAATTTTTTTTTGAGAGTTCATATTGAAAAAAGATTGCGACCTCGATGTTGGATTAA  
AGAACCTTAAGGTGTAGAGGCTTTAATAGGTAATCTGTTTCGATTTTTAAAATTTT

>defilippi2

AACAGCTGCGGTATTATAACTGTAAGGTAGCATAATAATTTGCTCTATAAATTAGGGCTAGAATG  
AATGGTTTGACGAGAATTAAGGTGCTCTACTTTATTTGTTAGAAATTAATTTTTATAGTGAAAAAGC  
TTGGATGGTTTAAAGGGACGAAAAGACCTATTGAGCTTTAATAATTTAATTTGGTTGGGGTGATCAA  
GGAATAAACTTCCTTATTAATGGGTTAATAAACCAAGTTTTTTGCTTATAAGGTAAGTTACCATAGG  
GATAACAGCGTAATTTTTTTTTGAGAGTTCATATTGAAAAAAGATTGCGACCTCGATGTTGGATTAA  
AGAACCTTAAGGTGTAGAGGCTTTAATAGGTAATCTGTTTCGATTTTTAAAATTTT

>defilippi3

AACAGCTGCGGTATTATAACTGTAAGGTAGCATAATAATTTGCTCTATAAATTAGGGCTAGAATG  
AATGGTTTGACGAGAATTAAGGTGCTCTACTTTATTTGTTAGAAATTAATTTTTATAGTGAAAAAGC  
TTGGATGGTTTAAAGGGACGAAAAGACCTATTGAGCTTTAATAATTTAATTTGGTTGGGGTGATCAA  
GGAATAAACTTCCTTATTAATGGGTTAATAAACCAAGTTTTTTGCTTATAAGGTAAGTTACCATAGG  
GATAACAGCGTAATTTTTTTTTGAGAGTTCATATTGAAAAAAGATTGCGACCTCGATGTTGGATTAA  
AGAACCTTAAGGTGTAGAGGCTTTAATAGGTAATCTGTTTCGATTTTTAAAATTTT

>digueti

AATAGCTGCGGTATTATAACTGTAAGGTAGCATAATAATTTGCCTTATAAATTAGGGCTAGAATG  
AATGGTTTGACGAGAATTAGACTGTCTCTATTTTATTTATTAGAAATTAATTTTTATAGTGAAAAAGC  
TTGGATATATTAAGGGACGAGAAGACCTATTGAGCTTTAATGATTTATTTTGATTGGGGTGATCAA  
GGAATAAACTTCCTTATAGATAAATTAATAAACCATATTTTTTTGCTTATAAGATAAGTTACCATAGG  
GATAACAGCGTAATTTTTTTTTGAGAGTTCATATTGAAAAAAGATTGCGACCTCGATGTTGGATTAA  
ATAACCTTAAGGTGAAGAAGCTTTATTAGGTGAATCTGTTTCGATTTTTAAAATTTT

>dofleini

AACAGCTGCGGTATTATAACTGTAAGGTAGCATAATAATTTGCCTTATAAATTAAGGCTAGAATG  
AATGGTTTGACGAAAATTATACTGTCTCTATTTTAATTAATAGAAATTAATTTTTATAGTGAAAAAGC  
TTAGATAATTTAAAGGGACGAGAAGACCTATTGAGCTTTTA?  
AATTTATTTTGATTGGGGTGATCAAGGAATAAACTTCCTTATTTTTAGAATAATTAACCAATGATAT  
TGCTTATATGATAAGTTACCATAGGGATAACAGCGTAATTTTTTTGGAGAGTTCATATTAAGAAAGA  
GATTGCGACCTCGATGTTGGATTAATAAACCATAAAGGTGAAGAGGCTTTATTTGGTGAATCTGTTCGA  
TTTTTAAAATTTT

>fitchi

AATAGCTGCGGTATTATAACTGTAAGGTAGCATAGTAATTTGCCTTATAAATTAGGGCTAGAATG  
AATGGTTTGACGAAAATTAGACTGTCTCTATTTTATTTATTAGAAATTAATTTTTATAGTGAGAAAAGC  
TTGAATAAATTAAGGGACGAGAAGACCTATTGAGCTTTAATTAATTGATTTTGATTGGGGTGATCAA  
GGAATAAACTTCCTTATTTATAGATTAATAAACCATAAATTTTTGCTTAGAAGATAAGTTACCATAGG  
GATAACAGCGTAATTTTTTTTTGAGAGTTCATATTGAAAGAAAAGATTGCGACCTCGATGTTGGATTAA  
ATAACCTTAAGGTGAAGAAGCTTTAATAGGTGAATCTGTTTCGATTTTTAAAATTTT

>hubbsorum1

AACAGCTGCGGTATTATAACTGTAAGGTAGCATAATAATTTGCTCTATAAATTGGGGCTAGAATG  
AATGGTTTGACGAAAATTTGACTGTCTCTATCTTATTTATTAGAAATTAATTTTTGTAGTGAGAAAAGC  
TTAAATTTTAAAGGGACGAAAAGACCTATTGAGCTTTAACAATTTATTTTGATTGGGGTGATCAA  
GGAATAAACTTCCTTATTTATAGAAGAATAAACCAAGTTTTTTGCTTAGAAGATAAGTTACCATAGG  
GATAACAGCGTAATTTTTTTTTGAGAGTTCATATTGAAAAAGAGATTGCGACCTCGATGTTGGATTAA  
AAAACCTTAAGGTGAAGAGGCTTTATTAGGTAATCTGTTTCGATTTTTAAAATTTT

>hubbsorum2

AACAGCTGCGGTATTATAACTGTAAGGTAGCATAATAATTTGCTCTATAAATTGGGGCTAGAATG  
AATGGTTTGACGAAAATTTGACTGTCTCTATCTTATTTATTAGAAATTAATTTTTGTAGTGAGAAAAGC  
TTAAATTTTAAAGGGACGAAAAGACCTATTGAGCTTTAACAATTTATTTTGATTGGGGTGATCAA  
GGAATAAACTTCCTTATTTATAGAAGAATAAACCAAGTTTTTTGCTTAGAAGATAAGTTACCATAGG  
GATAACAGCGTAATTTTTTTTTGAGAGTTCATATTGAAAAAGAGATTGCGACCTCGATGTTGGATTAA  
AAAACCTTAAGGTGAAGAGGCTTTATTAGGTAATCTGTTTCGATTTTTAAAATTTT

>hummelinck1

AACAGCTGCGGTATTATAACTGTAAGGTAGCATAATAATTTGCTCTATAAATTGGGGCTAGAATG

AATGGTTTGACGAAAATTTGACTGTCTCTATCTTATTTATTAGAAATTAATTTTTGTAGTGAGAAAGC  
TTAAATTGTTTAAAGGGACGAAAAGACCCTATTGAGCTTTAATAATTTATTTTATTGATTGGGGTGATCAA  
GGAATAAACTTCCTTATATATGGAAAAATAAACCAATTTTTTTGCTTAGAAGATAAGTTACCATAGG  
GATAACAGCGTAATTTTTTTTTGAGAGTTCATATTGAAAAAGAGATTGCGACCTCGATGTTGGATTAA  
AAAACCTTAAGGTGGAGAGGCTTTATTAGGTAATCTGTTTCGATTTTTAAAATTTT

>hummelinck3

AACAGCTGCGGTATTATAACTGTAAGGTAGCATAATAATTTGCTCTATAAATTGGGGCTAGAATG  
AATGGTTTGACGAAAATTTGACTGTCTCTATCTTATTTATTAGAAATTAATTTTTGTAGTGAGAAAGC  
TTAAATTGTTTAAAGGGACGAAAAGACCCTATTGAGCTTTAATAATTTATTTTATTGATTGGGGTGATCAA  
GGAATAAACTTCCTTATATATGGAAAAATAAACCAATTTTTTTGCTTAGAAGATAAGTTACCATAGG  
GATAACAGCGTAATTTTTTTTTGAGAGTTCATATTGAAAAAGAGATTGCGACCTCGATGTTGGATTAA  
AAAACCTTAAGGTGGAGAGGCTTTATTAGGTAATCTGTTTCGATTTTTAAAATTTT

>insularis1

AACAGCTGCGGTATTATAACTGTAAGGTAGCATAATAATTTGCTCTATAAATTGGGGCTAGAATG  
AATGGTTTGACGAAAATTTGACTGTCTCTATTTTATTTATTAGAAATTAATTTTTGTAGTGAGAAAGC  
TTAAATTGTTTAAAGGGACGAAAAGACCCTATTGAGCTTTAATAATTTATTTTATTGATTGGGGTGATCAA  
GGAATAAACTTCCTTATTTGTGGAAAAATAAACCAATTTTTTTGCTTAGAAGATAAGTTACCATAGG  
GATAACAGCGTAATTTTTTTTTGAGAGTTCATATTGAAAAAGAGATTGCGACCTCGATGTTGGATTAA  
AAAACCTTAAGGTGAAGAGGCTTTATTAGGTAATCTGTTTCGATTTTTAAAATTTT

>insularis4

AACAGCTGCGGTATTATAACTGTAAGGTAGCATAATAATTTGCTCTATAAATTGGGGCTAGAATG  
AATGGTTTGACGAAAATTTGACTGTCTCTATTTTATTTATTAGAAATTAATTTTTGTAGTGAGAAAGC  
TTAAATTGTTTAAAGGGACGAAAAGACCCTATTGAGCTTTAATAATTTATTTTATTGATTGGGGTGATCAA  
GGAATAAACTTCCTTATTTGTGGAAAAATAAACCAATTTTTTTGCTTAGAAGATAAGTTACCATAGG  
GATAACAGCGTAATTTTTTTTTGAGAGTTCATATTGAAAAAGAGATTGCGACCTCGATGTTGGATTAA  
AAAACCTTAAGGTGAAGAGGCTTTATTAGGTAATCTGTTTCGATTTTTAAAATTTT

>insularis5

AACAGCTGCGGTATTATAACTGTAAGGTAGCATAATAATTTGCTCTATAAATTGGGGCTAGAATG  
AATGGTTTGACGAAAATTTGACTGTCTCTATTTTATTTATTAGAAATTAATTTTTGTAGTGAGAAAGC  
TTAAATTGTTTAAAGGGACGAAAAGACCCTATTGAGCTTTAATAATTTATTTTATTGATTGGGGTGATCAA  
GGAATAAACTTCCTTATTTGTGGAAAAATAAACCAATTTTTTTGCTTAGAAGATAAGTTACCATAGG  
GATAACAGCGTAATTTTTTTTTGAGAGTTCATATTGAAAAAGAGATTGCGACCTCGATGTTGGATTAA  
AAAACCTTAAGGTGAAGAGGCTTTATTAGGTAATCTGTTTCGATTTTTAAAATTTT

>joubini

AATAGCTGCGGTATTATAACTGTAAGGTAGCATAATAATTTGCCTTATAAATTAAGGCTAGAATG  
AATGGTTTGACGAAAATTAAGGTGCTCTATTTTATTTATTAGAAATTAATTTTTATAGTGAAAAAGC  
TTGGATATATTAAGGGACGAGAAGACCCTATTGAGCTTTGAAAATTTATTTTATTGATTGGGGTGATCAA  
GGAAGAAACTTCCTTATATATAAATTAATAAACCATAGTTTTTTGCTTAGAAGATAAGTTACCATAGG  
GATAACAGCGTAATTTTTTTTTGAGAGTTCATATTGAGAAAAAGAGATTGCGACCTCGATGTTGGATTAA  
ATAACCTTAAGGTGGAGAAGCTTTATTGGGTGAATCTGTTTCGATTTTTAAAATTTT

>joubini3

AATAGCTGCGGTATTATAACTGTAAGGTAGCATAATAATTTGCCTTATAAATTAAGGCTAGAATG  
AATGGTTTGACGAAAATTAAGGTGCTCTATTTTATTTATTAGAAATTAATTTTTATAGTGAAAAAGC  
TTGGATATATTAAGGGACGAGAAGACCCTATTGAGCTTTGAAAATTTATTTTATTGATTGGGGTGATCAA  
GGAAGAAACTTCCTTATATATAAATTAATAAACCATAGTTTTTTGCTTAGAAGATAAGTTACCATAGG  
GATAACAGCGTAATTTTTTTTTGAGAGTTCATATTGAGAAAAAGAGATTGCGACCTCGATGTTGGATTAA  
ATAACCTTAAGGTGGAGAAGCTTTATTGGGTGAATCTGTTTCGATTTTTAAAATTTT

>maya

AACAGCTGCGGTATTATAACTGTAAGGTAGCATAATAATTTGCTCTATAAATTGGGGCTAGAATG  
AATGGTTTGACGAAAATTTGACTGTCTCTATCTTATTTATTAGAAATTAATTTTTATAGTGAGAAAGC  
TTAAATTATTTAAAGGGACGAAAAGACCCTATTGAGCTTTAGTAATTTATTTTATTGATTGGGGTGATCAA  
GGAATAAACTTCCTTATTTATGGAGAAAATAAACCAATTTTTTTGCTTAGATGATAAGTTACCATAGG  
GATAACAGCGTAATTTTTTTTTGAGAGTTCATATTGAAAAAGAGATTGCGACCTCGATGTTGGATTAA  
AAAACCTTAAGGTGAAGAGGCTTTATTAGGTAATCTGTTTCGATTTTTAAAATTTT

>maya2

AACAGCTGCGGTATTATAACTGTAAGGTAGCATAATAATTTGCTCTATAAATTGGGGCTAGAATG  
AATGGTTTGACGAAAATTTGACTGTCTCTATCTTATTTATTAGAAATTAATTTTTATAGTGAGAAAAGC  
TTAAATTATTTAAAGGGACGAAAAGACCCATTGAGCTTTAGTAATTTATTTTGATTGGGGTGATCAA  
GGAATAAACTTCCTTATTTATGGAGAAAATAAACCAATTTTTGCTTAGATGATAAGTTACCATAGG  
GATAACAGCGTAATTTTTTTTGGAGAGTTCATATTGAAAAAGAGATTGCGACCTCGATGTTGGATTAA  
AAAACCTTAAGGTGAAGAGGCTTTATTAGGTAATCTGTTTCGATTTTTAAAATTTT

>mercatoris

AATAGCTGCGGTATTATAACTGTAAGGTAGCATAATAATTTGCCTTATAAATTAAGGCTAGAATG  
AATGGTTTGACGAGAATTAGACTGTCTCTATTTTTATTTAATAGAAATTAATTTTTATGGTGAAAAAGC  
TTGAATATATTAAGGGACGAGAAGACCCATTGAGCTTTGGGAATTTATTTTGATTGGGGTGATCAA  
GGAAGAAACTTCCTTATATATAAATTAATAAACCATAGTTTTTGCTTAGAAGATAAGTTACCATAGG  
GATAACAGCGTAATTTTTTTTGGAGAGTTCATATTGAGAAAAAGAGATTGCGACCTCGATGTTGGATTAA  
ATAACCTTAAGGTGAAGAAGCTTTATTGGGTGAATCTGTTTCGATTTTTAAAATTTT

>mimicus

AACAGCTGCGGTATTATAACTGTAAGGTAGCATAATAATTTGCTCTATAAATTAGGGCTAGAATG  
AATGGTTTGACGAGAATTAACACTGTCTCTATTTTTATTTTTTAGAATTTAATTTTTATAGTGAAAAAGC  
TTAGATGATTTAAAGGGACGAAAAGACCCATTGAGCTTTAAGGATTTAATTTGGTTGGGGTGATCAA  
GGAATAAACTTCCTTATTAGTGGGTTAATAAACCAAGTTTTTGCTTATAAGGTAAGTTACCATAGG  
GATAACAGCGTAATTTTTTTTGGAGAGTTCATATTGAAAAAGAGATTGCGACCTCGATGTTGGATTAA  
AGAACCTTAAGGTGTAGAGGCTTTAATAGGTAATCTGTTTCGATTTTTAAAATTTT

>mimus1

AACAGCTGCGGTATTATAACTGTAAGGTAGCATAATAATTTGCTCTATAAATTGGGGCTAGAATG  
AATGGTTTGACGAAAATTTGACTGTCTCTATCTTATTTATTAGAAATTAATTTTTGTAGTGAGAAAAGC  
TTAAATTATTTAAAGGGACGAAAAGACCCATTGAGCTTTAACAATTTATTTTGATTGGGGTGATCAA  
GGAATAAACTTCCTTATTTATAGAAGAATAAACCAAGTTTTTGCTTAGAAGATAAGTTACCATAGG  
GATAACAGCGTAATTTTTTTTGGAGAGTTCATATTGAAAAAGAGATTGCGACCTCGATGTTGGATTAA  
AAAACCTTAAGGTGAAGAGGCTTTATTAGGTAATCTGTTTCGATTTTTAAAATTTT

>mimus2

AACAGCTGCGGTATTATAACTGTAAGGTAGCATAATAATTTGCTCTATAAATTGGGGCTAGAATG  
AATGGTTTGACGAAAATTTGACTGTCTCTATCTTATTTATTAGAAATTAATTTTTGTAGTGAGAAAAGC  
TTAAATTATTTAAAGGGACGAAAAGACCCATTGAGCTTTAACAATTTATTTTGATTGGGGTGATCAA  
GGAATAAACTTCCTTATTTATAGAAGAATAAACCAAGTTTTTGCTTAGAAGATAAGTTACCATAGG  
GATAACAGCGTAATTTTTTTTGGAGAGTTCATATTGAAAAAGAGATTGCGACCTCGATGTTGGATTAA  
AAAACCTTAAGGTGAAGAGGCTTTATTAGGTAATCTGTTTCGATTTTTAAAATTTT

>musakambe

AACAGCTGCGGTATTATAACTGTAAGGTAGCATAATAATTTGCCTTATAAATTAGGGCTAGAATG  
AATGGTTTGACGAAAATTATACTGTCTCTATTTTAATTAGTAGAAATTAATCTTTATAGTGAAAAAGC  
TTAAATAGTTTAAAGGGACGAGAAGACCCATTGAGCTTTAATAATATATTTTGATTGGGGTGATCAA  
GGAATAAACTTCCTTATTTTTAGAATAATTAACCAATGATATTGCTTATATGATAAGTTACCATAGG  
GATAACAGCGTAATTTTTTTTGGAGAGTTCATATTAAAAAAGAGATTGCGACCTCGATGTTGGATTAA  
AAAACCATATGGTGAAGAGGCTTTATGTGGTGAATCTGTTTCGATTTTTAAAATTTT

>musjanuari

AACAGCTGCGGTATTATAACTGTAAGGTAGCATAATAATTTGCCTTATAAATTGAGGCTAGAATG  
AATGGTTTGACGAAAATTGACTGTCTCTATTTTAATTAATAGAAATTAATTTTTATAGTGAAAAAGC  
TTAAATAGTTTAAAGGGACGAGAAGACCCATTGAGCTTTAATAATATATTTTGATTGGGGTGATCAA  
GGAATAAACTTCCTTATTTTTAGAATAATTAACCAATGATATTGCTTATATGATAAGTTACCATAGG  
GATAACAGCGTAATTTTTTTTGGAGAGTTCATATTAAAAAAGAGATTGCGACCTCGATGTTGGATTAA  
AAAACCATATGGTGAAGAGGCTTTATATGGTGAATCTGTTTCGATTTTTAAAATTTT

>muslonlongi

AACAGCTGCGGTATTATAACTGTAAGGTAGCATAATAATTTGCCTTATAAATTAGGGCTAGAATG  
AATGGTTTGACGAAAATTATACTGTCTCTATTTTAATTGGTAGAAATTAATCTTTATAGTGAAAAAGC  
TTAAATAGTTTAAAGGGACGAGAAGACCCATTGAGCTTTAATAATATATTTTGATTGGGGTGATCAA  
GGAATAAACTTCCTTATTTTTAGAATAATTAACCAATGATATTGCTTATATGATAAGTTACCATAGG

GATAACAGCGTAATTTTTTTGGAGAGTTCATATTAATAAAGAGATTGCGACCTCGATGTTGGATTAA  
AAAACCATATGGTGAAGAGGCTTTATGTGGTGAATCTGTTTCGATTTTTAAATTTT

>musyaquinae

AACAGCTGCGGTATTATAACTGTAAGGTAGCATAATAATTTGCCTTATAAATTAGGGCTAGAATG  
AATGGTTTAAACGAAAATTACTGTCTCTATTTTAAATTGATAGAAATTAATTTTTATAGTGAAAAAGC  
TTAAATAGTTTAAAGGGACGAGAAGACCTATTGAGCTTTAATAATATATTTTGGATTGGGGTGATCAA  
GGAATAAACTTCCTTATTTTTAGAATAATTAACCAATGATATTGCTTATATGATAAGTTACCATAGG  
GATAACAGCGTAATTTTTTTGGAGAGTTCATATTAATAAAGAGATTGCGACCTCGATGTTGGATTAA  
AAAACCATATGGTGAAGAGGCTTTATATGGTGAATCTGTTTCGATTTTTAAATTTT

>oculifer

AACAGCTGCGGTATTATAACTGTAAGGTAGCATAATAATTTGCTCTATAAATTGGGGCTAGAATG  
AATGGTTTGACGAAAATTTGGCTGTCTCTGTTTTATTTATTAGAAATTAATTTTTGTAGTGAAAAAGC  
TTAAATTATTTAAAGGGACGAAAAGACCTATTGAGCTTTAATAATTTATTTTGGATTGGGGTGATCGA  
GGAATAAACTTCCTTATTTTTGGAAAAATAACCAATTTTTTGGCTTAGAAGATAAGTTACCATAGG  
GATAACAGCGTAATTTTTTTTGGAGAGTTCATATTGAAAAAGAGATTGCGACCTCGATGTTGGATTAA  
AAAACCTTAAGGTGGAGAGGCTTTATTAGGTAATCTGTTTCGATTTTTAAATTTT

>ornatus

AACAGCTGCGGTATTATAACTGTAAGGTAGCATAATAATTTGCCTTGTAATTAAGGCTAGAATG  
AATGGTTTGACGAAAATTAAGCTGTCTCTGATTTATTTGTTAGAAATTAATTTTTATAGTGAAAAAGC  
TTGGATAATTTAAAGGGACGAGAAGACCTATTGAGCTTTAATAATATATTTTGGATTGGGGTGATCAA  
GGAATAAACTTCCTTATTAATTGAGTAATAACCAAGTTTTTGGCTTATAAGATAAGTTACCATAGG  
GGTAACAGCGTAATTTTTTTTGGAGAGTTCATATTGAAAAAGAGATTGCGACCTCGATGTTGGATTAA  
AATACCTTAAGGTGAAGAGGCTTTATTAGGTAATCTGTTTCGATTTTTAAATTTT

>tetricus1

AACAGCTGCGGTATTATAACTGTAAGGTAGCATAATAATTTGCCTTATAAATTGGGGCTAGAATG  
AATGGTTTGACGAGAATTTGACTGTCTCTATTTTTATTTATTAGAAATTAATTTTTATAGTGAAAAAGC  
TTTAATTATTTAAAGGGACGAAAAGACCTATTGAGCTTTAATAATTTACTTTGGTTGGGGTGATCAA  
GGAATAAACTTCCTTATTAATTGAAGAATAACCAAGTTTTTGGCTTAGAAGATAAGTTACCATAGG  
GATAACAGCGTAATTTTTTTTGGAGAGTTCATATTGAAAAAGAGATTGCGACCTCGATGTTGGATTAA  
AAGACCTTAAGGTGTAGAGGCTTTATTAGGTAATCTGTTTCGATTTTTAAATTTT

>tetricus2

AACAGCTGCGGTATTATAACTGTAAGGTAGCATAATAATTTGCCTTATAAATTGGGGCTAGAATG  
AATGGTTTGACGAGAATTTGACTGTCTCTATTTTTATTTATTAGAAATTAATTTTTATAGTGAAAAAGC  
TTTAATTATTTAAAGGGACGAAAAGACCTATTGAGCTTTAATAATTTACTTTGGTTGGGGTGATCAA  
GGAATAAACTTCCTTATTAATTGAAGAATAACCAAGTTTTTGGCTTGAAGATAAGTTACCATAGG  
GATAACAGCGTAATTTTTTTTGGAGAGTTCATATTGAAAAAGAGATTGCGACCTCGATGTTGGATTAA  
AAGACCTTAAGGTGTAGAGGCTTTATTAGGTAATCTGTTTCGATTTTTAAATTTT

>vulgaris1

AACAGCTGCGGTATTATAACTGTAAGGTAGCATAATAATTTGCCCTATAAATTGGGGCTAGAATG  
AATGGTTTGACGAGAATTTAACTGTCTCTATTTTTATTTATTAGAAATTAATTTTTATAGTGAAAAAGC  
TTTAATTGTTTAAAGGGACGAAAAGACCTATTGAGCTTTAATAGTTTACTTTGGTTGGGGTGATCAA  
GGAATAAACTTCCTTATTAGTTGAAGAATAACCAAGTTTTTGGCTTGAAGATAAGTTACCATAGG  
GATAACAGCGTAATTTTTTTTGGAGAGTTCATATTGAAAAAGAGATTGCGACCTCGATGTTGGATTAA  
AAGACCTTAAGGTGTAGAGGCTTTATTAGGTAATCTGTTTCGATTTTTAAATTTT

>vulgaris2

AACAGCTGCGGTATTATAACTGTAAGGTAGCATAATAATTTGCCCTATAAATTGGGGCTAGAATG  
AATGGTTTGACGAGAATTTGACTGTCTCTATTTTTATTTATTAGAAATTAATTTTTATAGTGAAAAAGC  
TTTGATTATTTAAAGGGACGAAAAGACCTATTGAGCTTTGATAGTTTACTTTGGTTGGGGTGATCAA  
GGAATAAACTTCCTTATTAGTTGAAGAATAACCAAGTTTTTGGCTTGAAGATAAGTTACCATAGG  
GATAACAGCGTAATTTTTTTTGGAGAGTTCATATTGAAAAAGAGATTGCGACCTCGATGTTGGATTAA  
AAGACCTTAAGGTGTAGAGGCTTTATTAGGTAATCTGTTTCGATTTTTAAATTTT

>vulgaris3

AACAGCTGCGGTATTATAACTGTAAGGTAGCATAATAATTTGCCCTATAAATTGGGGCTAGAATG  
AATGGTTTGACGAGAATTTGACTGTCTCTATTTTTATTTATTAGAAATTAATTTTTATAGTGAAAAAGC

TTTGATTATTTAAAGGGACGAAAAGACCCTATTGAGCTTTGATAGTTTACTTTGGTTGGGGTGATCAA  
GGAATAAACTTCCTTATTAGTTGAAGAATAAACCAAGTTTTTTGCTTAGAAGATAAGTTACCATAGG  
GATAACAGCGTAATTTTTTTTGGAGAGTTCATATTGAAAAAGAGATTGCGACCTCGATGTTGGATTAA  
AAGACCTTAAGGTGTAGAGGCTTTATTAGGTAAATCTGTTCGATTTTTAAAATTTT

>vulgaris4

AACAGCTGCGGTATTATAACTGTAAGGTAGCATAATAATTTGCCCTATAAATTGGGGCTAGAATG  
AATGGTTTGACGAGAATTTGACTGTCTCTATTTTTATTTATTAGAAATTAATTTTTATAGTGAAAAAGC  
TTTGATTATTTAAAGGGACGAAAAGACCCTATTGAGCTTTGATAGTTTACTTTGGTTGGGGTGATCAA  
GGAATAAACTTCCTTATTAGTTGAAGAATAAACCAAGTTTTTTGCTTAGAAGATAAGTTACCATAGG  
GATAACAGCGTAATTTTTTTTGGAGAGTTCATATTGAAAAAGAGATTGCGACCTCGATGTTGGATTAA  
AAGACCTTAAGGTGTAGAGGCTTTATTAGGTAAATCTGTTCGATTTTTAAAATTTT

>whitev

AACAGCTGCGGTATTATAACTGTAAGGTAGCATAATAATTTGCTCTATAAATTAGGGCTAGAATG  
AATGGTTTGACGAGAATTAACCTGTCTCTATTTTTATTTATTAGAAATTAATTTTTATAGTGAGAAAGC  
TTAAATGGTTTAAAGGGACGAAAAGACCCTATTGAGCTTTAATAATATAATTTGATTGGGGTGATCAA  
GGAATAAACTTCCTTATTAATGGGTTAATAAACCAAGTTTTTTGCTTAAAAGATAAGTTACCATAGG  
GATAACAGCGTAATTTTTTTTGGAGAGTTCATATTGAAAAAGAGATTGCGACCTCGATGTTGGATTAA  
AGAACCTTAAGGTGTAGAGGCTTTAATAGGTAAATCTGTTCGATTTTTAAAATTTT
