# Supplementary material for: A biogeographic framework of octopod species diversification: the role of the Isthmus of Panama
Source: PeerJ journal article supplement (doi:10.7717/peerj.8691), 2020-03-27
Supplement: SUPPLEMENTAL_S2_COI.pdf [file SUPPLEMENTAL_S2_COI.pdf]

>383

CGTACCGAATTAGGTCAACCAGGCTCACTCCTCAATGACGACCAACTTTACAATGTAATTGTAAGTGC  
ACATGCATTTGTGATAATTTTTTTTTTTAGTTATACCTGTTATAATTGGAGGATTTGGAAATTGATTAG  
TACCTTTAATAATTAGGAGCCCCAGATATAGCATTCCCCGAATAAATAATATAAGTTTCTGACTTCTC  
CCTCCTTCCTTAACCTTATTATTGACTTCAGCAGCTGTCGAAAGAGGAGTGGGAACAGGTTGAACTGT  
TTACCCCCCTCTATCAAGAAATCTCGCTCACACAGGCCCATCTGTAGATTTAGCAATTTTTCTACTTC  
ATTTAGCTGGAATTTTCATCCATTTTAGGAGCTATTAATTTTACTACTACAATCATTAAATATACGATGA  
GAAGGAATACAAATAGAACGTCTTCCTTTATTTGTTTGATCTGTATTTATTACAGCAATTCTTTTACT  
TTTATCTTTGCCTGTTCTCGCCGGAGCCATTACTATATTATTAAGTACCGAAATTTCAATACTACAT  
TTTTTGATCCTAGAGGAGGA

>384

CGTACTGAATTAGGTCAACCAGGCTCACTCCTCAATGACGATCAACTTTACAACGTAATTGTAAGTGC  
ACATGCATTTGTGATAATTTTTTTTTTTAGTTATACCTGTAATAATTGGAGGATTTGGAAATTGATTAG  
TACCTTTAATACTAGGAGCCCCAGATATAGCATTCCCCGAATAAATAATATAAGTTTCTGACTTCTT  
CCTCCTTCCTTAACCTTATTACTGACCTCAGCAGCCGTTGAAAGAGGAGTGGGAACAGGTTGAACTGT  
ATACCCTCCTCTATCAAGAAATCTCGCTCACACAGGCCCATCTGTAGATTTAGCAATTTTTCTACTTC  
ATTTAGCTGGAATTTTCATCCATTTTAGGAGCTATTAATTTTACTACTACAATTATTAATATACGATGG  
GAAGGAATACAAATAGAACGTCTTCCTTTATTTGTTTGATCTGTATTTATTACAGCAATTCTTTTACT  
TTTATCTTTACCCGTTCTCGCTGGAGCCATTACTATATTATTAAGTACCGAAATTTCAATACTACAT  
TTTTTGATCCTAGAGGAGGA

>385

CGTACTGAATTAGGTCAACCAGGCTCACTCCTCAATGACGATCAACTTTACAACGTAATTGTAAGTGC  
ACATGCATTTGTGATAATTTTTTTTTTTAGTTATACCTGTAATAATTGGAGGATTTGGAAATTGATTAG  
TACCTTTAATACTAGGAGCCCCAGATATAGCATTCCCCGAATAAATAATATAAGTTTCTGACTTCTT  
CCTCCTTCCTTAACCTTATTACTGACCTCAGCAGCCGTTGAAAGAGGAGTGGGAACAGGTTGAACTGT  
ATACCCTCCTCTATCAAGAAATCTCGCTCACACAGGCCCATCTGTAGATTTAGCAATTTTTCTACTTC  
ATTTAGCTGGAATTTTCATCCATTTTAGGAGCTATTAATTTTACTACTACAATTATTAATATACGATGG  
GAAGGAATACAAATAGAACGTCTTCCTTTATTTGTTTGATCTGTATTTATTACAGCAATTCTTTTACT  
TTTATCTTTACCCGTTCTCGCTGGAGCCATTACTATATTATTAAGTACCGAAATTTCAATACTACAT  
TTTTTGATCCTAGAGGAGGA

>386

CGTACTGAATTAGGTCAACCAGGCTCACTCCTCAATGACGATCAACTTTACAACGTAATTGTAAGTGC  
ACATGCATTTGTGATAATTTTTTTTTTTAGTTATACCTGTAATAATTGGAGGATTTGGAAATTGATTAG  
TACCTTTAATACTAGGAGCCCCAGATATAGCATTCCCCGAATAAATAATATAAGTTTCTGACTTCTT  
CCTCCTTCCTTAACCTTATTACTGACCTCAGCAGCCGTTGAAAGAGGAGTGGGAACAGGTTGAACTGT  
ATACCCTCCTCTATCAAGAAATCTCGCTCACACAGGCCCATCTGTAGATTTAGCAATTTTTCTACTTC  
ATTTAGCTGGAATTTTCATCCATTTTAGGAGCTATTAATTTTACTACTACAATTATCAATATACGATGG  
GAAGGAATACAAATAGAACGTCTTCCTTTATTTGTTTGATCTGTATTTATTACAGCAATTCTTTTACT  
TTTATCTTTACCCGTTCTCGCTGGAGCCATTACTATATTATTAAGTACCGAAATTTCAATACTACAT  
TTTTTGATCCTAGAGGAGGA

>bimaculatus

CGAACAGAATTAGGTCAACCAGGATCTCTTCTCAATGATGATCAATTATATAATGTTATTGTTACAGC  
CCATGCATTTGTAATAATCTTTTTCTTGTATACCTGTCATAATTGGAGGATTTGGCAACTGATTAG  
TTCCCTTAATATTGGGAGCCCCAGATATAGCATTCCACGAATAAATAACATAAGTTTTGACTTTTA  
CCACCCTCTCACTTTATTATTATCCTCAGCCGAGTAGAAAGAGGTGTAGGAAGTGGATGAACCGT  
ATATCCCCCTCTCAAGAACTTAGCTCATATAGGTCCATCCGTTGATTTAGCTATTTTTCTACTCC  
ACTTAGCCGGTATCTCATCTATCCTTGGAGCTATTAATTTTATTACAATTATTAATATACGATGA  
GAAGGAATACTAATAGAACGACTCCATTATTTGTATGATCAGTATTTATTACTGCAATTTTATTATT  
ACTTTCTTACCAGTTCTTGCTGGAGCAATTACAATACTTTTAACTGATCGAAATTTAATACCCTT  
TTTTTGATCCGAGAGGGGGG

>bimaculoides1

CGAACAGAATTAGGTCAACCAGGATCTCTTCTCAATGATGATCAATTATATAATGTTATTGTCACAGC  
CCATGCATTTGTAATAATCTTTTTCTTGTATGCCGTTATAATTGGAGGATTCGGCAACTGATTAG  
TTCCCTTAATATTAGGAGCCCCAGACATAGCATTCCACGAATAAATAATATAAGTTTTGACTTCTA

CCACCCTCTTTACTTTTACTATCCTCAGCTGCAGTAGAAAGAGGTGTAGGAACCGGATGAACCGT  
ATACCCTCCTTTTCAAGAAATTTAGCTCATATAGGTCCATCCGTTGATTTAGCTATTTTTTCACTAC  
ATCTAGCTGGTATCTCATCTATTCTTGGAGCTATTAATTTTATTACAACATCATTAAATACGATGA  
GAAGGAATACTAATAGAACGACTCCCATTATTTGTATGATCAGTATTTATTACTGCAATTTTATTATT  
ACTTTTCCTTACCAGTCCTTGCCGGAGCAATTACAATACTTTTAACTGATCGAAATTTTAAATACCACTT  
TCTTTGACCCAAGAGGAGGA

>bimaculoides2

CGAACAGAATTAGGTCAACCAGGATCTCTTCTCAATGATGATCAATTATATAATGTTATTGTACAGC  
CCATGCATTTGTAATAATCTTTTTCTTGTATGCCCGTTATAATTGGAGGATTCGGCAACTGATTAG  
TTCCCTTAATATTAGGAGCCCCAGACATAGCATTTCACGAATAAATAATATAAGTTTTTGACTTCTA  
CCACCCTCTTTACTTTTACTATCCTCAGCTGCAGTAGAAAGAGGTGTAGGAACCGGATGAACCGT  
ATACCCTCCTTTTCAAGAAATTTAGCTCATATAGGTCCATCCGTTGATTTAGCTATTTTTTCACTAC  
ATCTAGCTGGTATCTCATCTATTCTTGGAGCTATTAATTTTATTACAACATCATTAAATACGATGA  
GAAGGAATACTAATAGAACGACTCCCATTATTTGTATGATCAGTATTTATTACTGCAATTTTATTATT  
ACTTTTCCTTACCAGTCCTTGCCGGAGCAATTACAATACTTTTAACTGATCGAAATTTTAAATACCACTT  
TCTTTGACCCAAGAGGAGGA

>briareus

CGAACAGAATTAGGACAACCTGGTTCCTCCTTAATGATGATCAACTATATAATGTAATCGTCACAGC  
TCATGCATTCGTAATAATTTTTCTTCTTGTATACCAGTCATAATTGGAGGATTTGGAAATTGATTAG  
TACCATTAATATTAGGTGCCCTGATATAGCATTCCCTCGAATAAATAATATAAGCTTTTTGACTTCTC  
CCCCCATCATTAACTCTCTTATTATCTTCTGCTGCAGTAGAAAGTGGTGTGGAACTGGATGAACCGT  
TTACCCCCCTCTTTCAAGAAATTTAGCTCATATAGGACCATCTGTCGATTTAGCTATTTTTTCACTTC  
ATCTAGCAGGATTTCTTCAATTCTTGGAGCTATTAACCTTATCACAACATTTATTAATACGATGA  
GAAGGAATATTTATAGAACGACTTCCACTATTTGTATGATCCGTCTTCATTACTGCTATTCTACTTCT  
CCTTTTATTACCAGTTCTTGCTGGAGCAATTACTATACTCCTAACCGATCGAAATTTTAAATACCACAT  
TTTTTGATCCTAGAGGAGGA

>briareus2

CGAACAGAATTAGGACAACCTGGTTCCTCCTTAATGATGATCAACTATATAATGTAATCGTCACAGC  
TCATGCATTCGTAATAATTTTTCTTCTTGTATACCAGTCATAATTGGAGGATTTGGAAACTGATTAG  
TACCATTAATATTAGGTGCCCTGATATAGCATTCCCTCGAATAAATAATATAAGCTTTTTGACTTCTC  
CCCCCATCATTAACTCTCTTATTATCTTCTGCTGCAGTAGAAAGTGGTGTGGAACTGGATGAACCGT  
TTACCCCCCTCTTTCAAGAAATTTAGCTCATATAGGACCATCTGTCGATTTAGCTATTTTTTCACTTC  
ATCTAGCAGGATTTCTTCAATTCTTGGAGCTATTAACCTTATCACAACATTTATTAATACGATGA  
GAAGGAATACTTATAGAACGACTTCCACTATTTGTATGATCCGTCTTCATTACTGCTATTCTACTTCT  
GCTTTTATTACCAGTTCTTGCTGGAGCAATTACTATACTCCTAACCGATCGAAATTTTAAATACCACAT  
TTTTTGATCCTAGAGGAGGA

>defilippi1

CGAACAGAATTAGGACAACCGGATCTCTCTTAAATGATGACCAATTATATAATGTAATTGTAACAGC  
TCATGCATTCGTAATAATTTTTTTTCTAGTTATACCTGTAATAATTGGAGGATTTGGAAATTGATTAG  
TGCCTTTGATATTAGGAGCTCCTGATATAGCTTTCCCTCGAATAAATAACATAAGATTTTGTACTT  
CCCCCTCATTAACTACTTTTTATCTTCAGCTGCAGTTGAAAGAGGTGTAGGAACCGGATGAACCTGT  
ATACCCTCCACTCTCAAGAAATCTAGCTCACATAGGACCCTCAGTCGATCTTGCTATTTTTTCTCTTC  
ATTTAGCTGGTATTTTTCGTCATTTCTTGGAGCCATTAATTTTATTACTACTATTATTAATACGATGA  
GAAGGAATATTAATAGAACGTCTCCCCTTATTCGTCTGATCTGTTTTTATTACAGCAATTCTACTACT  
CTTATCACTCCCAGTTTTAGCAGGTGCGATTACTATATTAAACAGATCGAACTTTAACACTACAT  
TTTTTGATCCAAGAGGTGGA

>defilippi2

CGAACAGAATTAGGACAACCGGATCTCTCTTAAATGATGACCAATTATATAATGTAATTGTAACAGC  
TCATGCATTCGTAATAATTTTTTTTCTAGTTATACCTGTAATAATTGGAGGATTTGGAAATTGATTAG  
TGCCTTTGATATTAGGAGCTCCTGATATAGCTTTCCCTCGAATAAATAACATAAGATTTTGTACTT  
CCCCCTCATTAACTACTTTTTATCTTCAGCTGCAGTTGAAAGAGGTGTAGGAACCGGATGAACCTGT  
ATACCCTCCACTCTCAAGAAATCTAGCTCACATGGGACCCTCAGTCGATCTTGCTATTTTTTCTCTTC  
ATTTAGCTGGTATTTTTCGTCATTTCTTGGAGCCATTAATTTTATTACTACTATTATTAATACGATGA  
GAAGGAATATTAATAGAACGTCTCCCCTTATTCGTCTGATCTGTTTTTATTACAGCAATTCTACTACT

CTTATCACTCCCAGTTTTAGCAGGTGCGATTACTATATTATTAACAGATCGAAACTTTAACACTACAT  
TTTTTGATCCAAGAGGTGGA

>defilippi3

CGAACAGAATTAGGACAACCAGGATCTCTCTTAAATGATGACCAATTATATAATGTAATTGTAACAGC  
TCATGCATTTCGTAATAATTTTTTTCTAGTTATACCTGTAATAATTGGAGGTTTTGGAAATTGATTAG  
TGCCTTTGATATTAGGAGCTCCTGATATAGCTTTCCCTCGAATAAATAACATAAGATTTTGATTACTT  
CCCCCTCATTAACTACTTTTTATCTTCAGCTGCAGTTGAAAGAGGTGTAGGAACCGGATGAACTGT  
ATATCCTCCACTCTCAAGAAATCTAGCTCACATGGGACCCTCAGTCGATCTTGCTATTTTTCTCTTC  
ATTTAGCTGGTATTTTCGTC AATTCTTGGAGCCATTAATTTTATTACTACTATTATTAATATACGATGA  
GAAGGAATATTAATAGAACGTCTCCCTTATTCGTCTGATCTGTTTTTATTACAGCAATTCTACTACT  
CCTATCACTCCCAGTTTTAGCAGGTGCGATTACTATATTATTAACAGACCGAAACTTTAACACTACAT  
TTTTTGATCCAAGAGGTGGA

>digueti

CGAACAGAATTAGGTCAACCAGGATCCCTATTAATGATGATCAATTATACAATGTAATCGTAACTGC  
TCATGCTTTTGTCAATAATTTTTTTTTAGTTATACCAGTAATAATTGGAGGATTTGGTAACTGATTAG  
TTCCACTAATATTAGGAGCTCCAGATATAGCATTCCCTCGTATAAATAATATAAGATTTTGATTACTT  
CCCCCTCATTAACTACTCCTTACCTCAGCTGCTGTTGAAAGTGGTGTAGGAACGGATGAACTGT  
TTACCCCTCTCTCTAGAAATCTAGCTCATATAGGTCCCTCAGTCGATCTCGCTATTTTCTCGCTCC  
ATTTAGCAGGAATTTTCATCTATTCTAGGAGCTATTAACCTTATTACTACTATTATTAATATACGATGA  
GAAGGAATATTAATGGAACGTCTTCTTTATTTGTTTGATCAGTTTTTATTACTGCAATTTTATTACT  
TTTATCTTCCAGTTCTTGCTGGAGCTATTACTATATTACTTACTGATCGTAATTTTAAACCACTT  
TTTTTGATCCAAGAGGAGGA

>dofleini

CGAACAGAACTAGGACAACCTGGATCTTTACTAAATGATGATCAACTTTATAACGTCATTGTTACTGC  
CCACGCTTTTGTAAATAATTTTCTTTTTAGTTATACCCGTAATAATTGGAGGATTTGGAACTGATTAG  
TCCCTTTAATATTAGGAGCTCCAGATATAGCATTCCACGAATAAACAATATAAGATTTTGATTACTT  
CCCCCTCTTTAACTCTCCTATTAACCTCAGCAGCAGTAGAAAGAGGAGCAGGAACAGGTTGAACTGT  
ATACCCTCCATTATCTAGAAATTTAGCCCATATAGGTCTTCTGTAGATCTAGCAATTTTTCTCTTC  
ATTTAGCAGGATTTTCTCTATTTTAGGAGCTATTAATTTTCATCACAATATTATTAATATACGATGA  
GAAGGGATACAAATAGAACGTCTTCCACTATTTGTATGATCTGTTCTAATTACAGCAGTTCTTCTCT  
ATTATCTTACCAGTATTAGCAGGTGCCATTACTATACTTCTTACTGATCGTAACCTCAATACAATTT  
TTTTTGACCAAGAGGAGGG

>fitchi

CGAACAGAATTAGGCCAACCAGGATCTTTATTAATGACGATCAATTATATAATGTAATTGTAACCTGC  
TCATGCATTTCGTTATAATTTTCTTTTTAGTTATACCAGTAATGATTGGTGGATTTGGTAAATTGATTAG  
TACCATTAATATTAGGAGCTCCAGATATAGCTTTCCCTCGAATAAATAATATAAGCTTTTGATTACTT  
CCCCCTCATTAACTTACTTCTTTGTTGAGCTGCGGTTGAAAGAGGGGTAGGTACAGGATGAACTGT  
CTACCCCTTTTATCAAGAAATTTAGCTCATATAGGTCTTCTGTTGATCTTGCTATTTTCTCTTTAC  
ATTTAGCAGGAATTTTCATCTATTTTAGGAGCAATTAACCTTCACTACTATTATTAATATACGATGA  
GAAGGTATACTTATAGAACGACTTCTTTATTTGTTTGATCCGATTTTATTACCGCAATTTTATTACT  
TCTATCCCTTCTGTTCTTGCTGGAGCCATTACTATACTTTTAAACCGACCGTAATTTTAACTACCT  
TTTTTGACCTAGAGGAGGA

>hubbsorum1

CGAACAGAATTAGGTCAACCAGGATCTCTCCTAAATGATGATCAACTATATAACGTAATTGTTACAGC  
ACATGCATTTGTAATAATTTTTTTCTTGTTATACCTGTTATAATTGGAGGATTTGGTAAATTGATTAG  
TTCCCTTAATACTAGGAGCTCCAGACATAGCATTCCACGAATAAACAATATAAGTTTTGACTTTTA  
CCACCTTCTTACCCTATTATTATCTTCAGCTGCAGTAGAAAGAGGTGCAGGTAAGGATGGACTGT  
ATATCCCCTCTTCAAGAAATTTAGCTCATATAGGCCCTTCCGTTGATCTAGCTATTTTTCTCTTC  
ATTTAGCTGGTATTTTCATCTATTCTTGGAGCCATTAACCTTCACTACTATTATCAATATACGATGA  
GAAGGAATATTAATAGAACGACTTCCATTATTTGTATGATCAGTATTTATTACCGCAATTTTATTACT  
TCTTCTTACCAGTCTTGCTGGAGCAATTACAATACTCTTAAACAGATCGAAATTTTAACTACCT  
TTTTTGACCAAGGGGAGGA

>hubbsorum2

CGAACAGAATTAGGTCAACCAGGATCTCTCCTAAATGATGATCAACTATATAACGTAATTGTTACAGC

ACATGCATTTGTAATAATTTTTTTTTCTTGTTATACCTGTTATAATTGGAGGATTTGGTAATTGATTAG  
TTCCCTTAATACTAGGAGCTCCAGACATAGCATTCCCACGAATAAACAATATAAGTTTTTGACTTTTA  
CCACCTTCTCTTACCCTATTATTATCTTCAGCTGCAGTAGAAAGAGGTGCAGGTACTGGATGGACTGT  
ATATCCCCCTCTTTCAAGAAATTTAGCTCATATAGGCCCTCCGTTGATCTAGCTATTTTTTCTCTTC  
ATTTAGCTGGTATTTTCATCTATTCTTGGAGCCATTAACCTCATTACAAC TATTATCAATATACGATGA  
GAAGGAATATTAATAGAACGACTTCCATTATTTGTATGATCAGTATTTATTACCGCAATTTTATTACT  
TCTTTCCTTACCAGTCTTGCTGGAGCAATTACAATACTCTAACAGATCGAAATTTTAATACCACTT  
TTTTTGACCCAAGGGGAGGA

>hummelinck1

CGAACAGAATTAGGACAACCAGGATCTCTTCTCAATGATGATCAATTATATAATGTAATTGTTACAGC  
ACATGCATTTGTAATAATTTTTTTTTCTAGTTATACCTGTTATAATTGGAGGATTTGGCAATTGATTAG  
TCCCTTAATATTAGGAGCTCCAGATATAGCATTCCCACGAATAAATAATATAAGTTTTTGACTTTTA  
CCACCTTCTCTTACCCTATTACTATCTTCAGCTGCAGTAGAAAGAGGGGCAGGTACTGGATGAACTGT  
ATATCCTCCTCTTTCAAGAACTTAGCTCATATAGGACCTCCGTCGATCTAGCTATTTTTTCTCTTC  
ACTTAGCTGGTATTTTCATCCATTCTTGGAGCCATTAATTTTATCACAAC TATTATCAATATACGATGA  
GAAGGAATATTAATAGAACGACTCCCATTATTTGTGTGAGCAGTATTTATTACCGCAATTCTACTACT  
ACTTTCCTTACCAGTCTTGCTGGAGCAATTACAATACTTCTAACAGACCGAAATTTTAATACCACTT  
TTTTCGATCCAAGAGGAGGT

>hummelinck3

CGAACAGAACTAGGACAACCAGGATCTCTTCTCAATGATGATCAATTATATAATGTAATTGTTACAGC  
ACATGCATTTGTAATAATTTTTTTTTCTAGTTATACCTGTTATAATTGGAGGATTTGGTAATTGATTAG  
TCCCTTAATATTAGGAGCTCCAGATATAGCATTCCCACGAATAAATAATATAAGTTTTTGACTTTTA  
CCACCTTCTCTTACCCTATTATTATCTTCAGCTGCAGTAGAAAGAGGGGCAGGTACTGGATGAACTGT  
ATATCCTCCTCTTTCAAGAACTTAGCTCATATAGGACCTCCGTCGATCTAGCTATTTTTTCTCTTC  
ACTTAGCTGGTATTTTCATCCATTCTTGGAGCCATTAATTTTATCACAAC TATTATCAATATACGATGA  
GAAGGAATATTAATAGAACGACTCCCATTATTTGTGTGAGCAGTATTTATTACCGCAATTCTACTACT  
ACTTTCCTTACCAGTCTTGCTGGAGCAATTACAATACTTCTAACAGACCGAAATTTTAATACCACTT  
TTTTCGATCCAAGAGGAGGT

>insularis1

CGAACAGAATTAGGTCAACCAGGATCTCTTCTTAATGATGACCAACTATAACAATGTAATTGTAACAGC  
ACATGCATTTGTAATAATTTTTTTTTCTAGTTATACCTGTTATAATTGGAGGATTTGGTAATTGATTAG  
TTCCCTTAATACTAGGAGCCCCAGATATAGCATTCCCACGAATAAATAACATAAGTTTTTGACTTTTA  
CCACCTTCTCTTACCCTATTATTATCTTCAGCCGCAGTAGAAAGAGGTGCAGGTACCGGATGAACTGT  
ATACCCTCCTCTTTCAAGAAATTTAGCCCATATAGGTCCTCCGTTGATCTAGCTATTTTTCTCCCTTC  
ATTTAGCTGGTATTTTCATCCATTCTTGGAGCCATTAATTTTATTACAAC TATTATCAATATACGATGA  
GAAGGAATATTAATAGAACGACTCCCATTATTTGTATGAGCAGTATTTATTACTGCAATTTTATTACT  
ACTCTCCTTACCAGTCTCGCTGGAGCAATTACTATACTTTTAACAGATCGAAATTTTAATACCACTT  
TTTTTGACCCAAGAGGTGGT

>insularis4

CGAACAGAATTAGGTCAACCAGGATCTCTTCTTAATGATGACCAACTATAACAATGTAATTGTAACAGC  
ACATGCATTTGTAATAATTTTTTTTTCTAGTTATACCTGTTATAATTGGAGGATTTGGTAATTGATTAG  
TTCCCTTAATACTAGGAGCCCCAGATATAGCATTCCCACGAATAAATAACATAAGTTTTTGACTTTTA  
CCACCTTCTCTTACCCTATTATTATCTTCAGCCGCAGTAGAAAGAGGTGCAGGTACCGGATGAACTGT  
ATACCCTCCCCTTTCAAGAAATTTAGCCCATATAGGTCCTCCGTTGATCTAGCTATTTTTCTCCCTTC  
ATTTAGCTGGTATTTTCATCCATTCTTGGAGCCATTAATTTTATTACAAC TATTATCAATATACGATGA  
GAAGGAATATTAATAGAACGACTCCCATTATTTGTATGAGCAGTATTTATTACTGCAATTTTATTACT  
ACTCTCCTTACCAGTCTCGCTGGAGCAATTACTATACTTTTAACAGATCGAAATTTTAATACCACTT  
TTTTTGACCCAAGAGGTGGT

>insularis5

CGAACAGAATTAGGTCAACCAGGATCTCTTCTTAATGATGACCAACTATAACAATGTAATTGTAACAGC  
ACATGCATTTGTAATAATTTTTTTTTCTAGTTATACCTGTTATAATTGGAGGATTTGGTAATTGATTAG  
TTCCCTTAATACTAGGAGCCCCAGATATAGCATTCCCACGGATAAATAACATAAGTTTTTGACTTTTA  
CCTCCTTCTCTTACCCTATTATTATCTTCAGCCGCAGTAGAAAGAGGTGCAGGTACCGGATGAACTGT  
ATATCCTCCTCTTTCAAGAAATTTAGCCCATATAGGTCCTCCGTTGATCTAGCTATTTTTCTCCCTTC

ATTTAGCTGGTATTTTCATCCATTCTTGGAGCCATTAATTTTATTACAACCTATTATCAATATACGATGA  
GAAGGAATATTAATAGAACGACTCCATTATTTGTATGAGCAGTATTTATTACTGCAATTTTATTACT  
ACTCTCCTTACCAGTCCTCGCTGGAGCAATTACTATACTTTTAAACAGATCGAAATTTTAAATACCACTT  
TTTTTGACCCAAGAGGTGGT

>joubini

CGAACAGAATTAGGCCAACCAGGATCTTTATTAATGATGATCAATTATATAATGTAATTGTAACCGC  
TCATGCTTTTGTATAATTTTTTTTTTTGGTTATACCAATTATAATTGGAGGATTTGGAAACTGACTAG  
TCCCCTTAATATTAGGAGCACCAGATATAGCTTTTCTCGAATAAACAATATAAGATTTTGTATTATA  
CCTCCCTCTTTAACATTACTACTTACTTCAGCTGCTGTTGAAAGAGGTGTAGGAACTGGATGAACTGT  
ATACCCTCCTCTTTCTAGAACTTAGCTCATATAGGCCCTTCAGTAGATCTTGCTATTTTTTCTCTTC  
ACTTAGCTGGAATCTCTTCTATTTTAGGAGCTATTAATTTTATCACCACCATTATTAATATACGCTGA  
GAAGGAATATTAATAGAACGACTTCCTTTATTTGTTTGATCAGTTTTTATTACAGCTGTATTACT  
ATTATCCCTCCTGTTCTAGCTGGAGCTATTACTATACTTCTTACCGATCGTAATTTTAAACTACTT  
TTTTTGATCCAAGAGGAGGA

>joubini3

CGAACAGAATTAGGTCAACCAGGATCTTTATTAATGATGATCAACTATATAATGTAATTGTAACCGC  
TCATGCTTTTGTATAATTTTTTTTTTTGGTTATACCAGTTATAATTGGAGGATTTGGAAATTGATTAG  
TACCTTTAATACTAGGAGCTCCAGATATAGCTTTCCCCGTATAAATAATATAAGATTTTGTACTT  
CCACCCTCATTAACTACTTACTTACTTCAGCTGCTGTTGAAAGAGGTGTAGGAACTGGATGAACTGT  
ATACCCCTCCTTTCTAGAAATTTAGCTCATATAGGCCATCAGTTGATCTTGCCATTTTCTCTCTTC  
ACTTAGCTGGAATCTCATCTATTTTAGGAGCTATTAATTTTATTACTACTATTATTAACATACGATGA  
GAAGGAATATTAATAGAACGACTTCCTTTATTTGTATGATCTGTTTTTATTACTGCAGTTTTACTACT  
TTTATCTCTACCTGTTCTTGCAGGAGCTATTACTATACTTCTTACTGACCGTAATTTCAATACCACTT  
TTTTTGATCCTAGAGGAGGA

>maya

CGAACAGAATTAGGTCAACCAGGATCTCTTCTTAATGATGATCAATTATATAATGTAATTGTAACAGC  
ACATGCATTTGTAATAATTTTTTTTTTTAGTTATACCTGTTATAATTGGAGGATTTGGAAATTGACTAG  
TACCTTTAATATTAGGAGCTCCAGATATAGCATTTCGCGAATAAATAATATAAGTTTCTGACTTTTA  
CCACCTTCTCTTACCCTATTATTATCTTCAGCTGCAGTAGAAAGAGGTGTAGGTACTGGATGAACTGT  
ATATCCTCCCCTTTCAAGAAATTTAGCCCATATAGGTCTTCCGTTGACCTAGCTATTTTTTCTCTTC  
ACCTAGCCGGTATTTTCATCTACTCTTGGAGCCATTAATTTTATTACAACCTATTATTAATATACGATGA  
GAAGGAATACTTATAGAACGACTTCATTATTTGTATGAGCAGTTTTTATTACCGCAATCTTATTATT  
ACTTTCTTTACCAGTCCTTGCTGGAGCAATTACAATACTCTTAAACAGATCGAAATTTCAATACCACTT  
TTTTTGATCCTAGAGGAGGA

>maya2

CGAACAGAATTAGGTCAACCAGGATCTCTTCTTAATGATGATCAATTATATAATGTAATTGTAACAGC  
ACATGCATTTGTAATAATTTTTTTTTTTAGTTATACCTGTTATAATTGGAGGATTTGGAAATTGACTAG  
TACCTTTAATATTAGGAGCTCCAGATATAGCATTTCGCGAATAAATAATATAAGTTTCTGACTTTTA  
CCACCTTCTCTTACCCTATTATTATCTTCAGCTGCAGTAGAAAGAGGTGTAGGTACTGGATGAACTGT  
ATATCCTCCCCTTTCAAGAAATTTAGCCCATATAGGTCTTCCGTTGACCTAGCTATTTTTTCTCTTC  
ACCTAGCCGGTATTTTCATCTATTCTTGGAGCCATTAATTTTATTACAACCTATTATTAATATACGATGA  
GAAGGAATACTTATAGAACGACTTCATTATTTGTATGAGCAGTTTTTATTACCGCAATCTTATTATT  
ACTTTCTTTACCAGTCCTTGCTGGAGCAATTACAATACTCTTAAACAGATCGAAATTTCAATACCACTT  
TTTTTGATCCTAGAGGAGGA

>mercatoris

CGAACAGAATTAGGCCAACCAGGATCTTTATTAATGATGATCAATTATATAATGTAATTGTAACCGC  
TCATGCTTTTGTATAATTTTTTTTTTTGGTTATACCAATTATAATTGGAGGATTTGGAAACTGACTAG  
TCCCCTTAATATTAGGAGCACCAGATATAGCTTTTCTCGAATAAACAATATAAGATTTTGTATTATA  
CCTCCCTCTTTAACATTACTACTTACTTCAGCTGCTGTTGAAAGAGGTGTAGGAACTGGATGAACTGT  
ATACCCTCCTCTTTCTAGAACTTAGCTCATATAGGCCCTTCAGTAGATCTTGCTATTTTTTCTCTTC  
ACTTAGCTGGAATCTCTTCTATTTTAGGAGCTATTAATTTTATCACCACCATTATTAATATACGCTGA  
GAAGGAATATTAATAGAACGACTTCCTTTATTTGTTTGATCAGTTTTTATTACAGCTGTATTACT  
ATTATCCCTCCTGTTCTAGCTGGAGCTATTACTATACTTCTTACCGATCGTAATTTTAAACTACTT  
TTTTTGATCCAAGAGGAGGA

>mimicus

CGAACAGAATTAGGTCAACCAGGATCTCTTCTTAATGATGATCAATTATATAATGTTATTGTAACAGC  
CCATGCTTTCGTAATAATTTTTTTCTTAGTTATACCTGTTATAATTGGAGGATTTGGTAATTGATTAG  
TACCATTAATATTAGGAGCCCCTGATATAGCATTCCCCGAATAAATAATATAAGATTTTGATTACTT  
CCACCTTCACTTACACTGCTTTTTATCATCAGCTGCAGTTGAAAGAGGTGTAGGAAGTGGATGAACTGT  
ATATCCTCCACTCTCAAGAAATTTAGCTCATATAGGACCATCAGTTGATCTTGCTATTTTTTCCCTAC  
ATCTAGCAGGAATTTTCATCAATTCTTGGAGCTATTAATTTTATTACCACTATTATTAATATACGATGA  
GAAGGAATACTAATAGAACGACTCCCCTTATTTGTTTGATCTGTATTTTATTACAGCAATTTTATTAAT  
ATTATCACTACCTGTTTTAGCTGGTGCAATTACTATATTATTAACCGACCGAAATTTTAACACTACAT  
TCTTTGATCCAAGAGGTGGG

>mimus2

CGAACAGAATTAGGTCAACCAGGATCTCTCCTAAATGATGATCAACTATATAACGTAATTGTTACAGC  
ACATGCATTTGTAATAATTTTTTTCTTGTATACCTGTTATAATTGGAGGATTTGGTAATTGATTAG  
TTCCCTTAATACTGGGAGCTCCAGACATAGCATTCCACGAATAAATAATATAAGTTTTTGACTTTTA  
CCACCTTCTCTTACCCTATTATTATCTTCAGCTGCAGTAGAAAGAGGTGCAGGTAAGTGGATGAACTGT  
ATATCCCCCTCTTTCAAGAAATTTAGCTCATATAGGCCCTTCCGTTGATCTAGCTATTTTTTCTCTTC  
ATTTAGCTGGTATTTTCATCTATTCTTGGAGCCATTAACCTTCACTTACAACCTATTGTCAATATACGATGA  
GAAGGAATATTAATAGAACGACTTCCATTATTTGTATGATCAGTATTTTATTACCGCAATTTTATTACT  
TCTTTCTTACCAGTCTTGCTGGAGCAATTACAATACTCTAACAGATCGAAATTTTAATACCACTT  
TTTTTGACCAAGGGGAGGA

>mimus1

CGAACAGAATTAGGTCAACCAGGATCTCTCCTAAATGATGATCAACTATATAACGTAATTGTTACAGC  
ACATGCATTTGTAATAATTTTTTTCTTGTATACCTGTTATAATTGGAGGATTTGGTAATTGATTAG  
TTCCCTTAATACTGGGAGCTCCAGATATAGCATTCCACGAATAAATAATATAAGTTTTTGACTTTTA  
CCACCTTCTCTTACCCTATTATTATCTTCAGCTGCAGTAGAAAGAGGTGCAGGTAAGTGGATGAACTGT  
ATATCCCCCTCTTTCAAGAAATTTAGCTCATATAGGCCCTTCCGTTGATCTAGCTATTTTTTCTCTTC  
ATTTAGCTGGTATTTTCATCTATTCTTGGAGCCATTAACCTTCACTTACAACCTATTGTCAATATACGATGA  
GAAGGAATATTAATAGAACGACTTCCATTATTTGTATGATCAGTATTTTATTACCGCAATTTTATTACT  
TCTTTCTTACCAGTCTTGCTGGAGCAATTACAATACTCTAACAGATCGAAATTTTAATACCACTT  
TTTTTGACCAAGGGGAGGA

>oculifer

CGAACAGAGTTAGGTCAACCAGGATCTCTCCTCAATGATGATCAATTATATAATGTAATCGTTACAGC  
ACATGCATTTGTAATAATTTTTTTTTTAGTTATACCCGTTATAATTGGAGGATTTGGAACTGATTAG  
TTCCCTTAATATTAGGAGCTCCAGATATAGCATTCCACGAATAAATAATATAAGTTTTTGACTTTTA  
CCACCTTCTCTTACCCTATTACTATCTTCAGCTGCAGTAGAAAGAGGTGTAGGAAGTGGATGAACTGT  
ATATCCACCTCTCTCAAGTAATTTAGCCCACATAGGTCCTTCCGTTGACCTAGCTATTTTTTCTCTCC  
ACCTAGCCGGTATTTTCATCTATTCTTGGAGCCATTAACCTTATTACAACCTATTATCAATATACGATGA  
GAAGGAATATTAATAGAACGACTTCCATTATTTGTATGATCAGTATTTTATTACTGCAGTTTTTATTACT  
ACTTTCTTACCAGTCTTGCTGGAGCAATTACAATACTTTTAACCGATCGAAATTTCAACACCACTT  
TTTTTGATCCTAGAGGAGGA

>ornatus

CGTACTGAAGTAGGCCAACCAGGCTCACTCCTCAATGACGATCAACTTTACAACGTAATTGTAAGTGC  
ACATGCATTTGTAATAATTTTTTTTTTAGTTATACCCGTAATAATTGGAGGATTTGGAACTGATTAG  
TCCCTTTAATATTAGGAGCCCAGATATAGCATTCCCCGAATAAATAATATAAGTTTTCTGACTTCTA  
CCTCCTTCTTAACTTATTATTAACCTCAGCAGCTGTTGAAAGAGGAGTAGGAACAGGTTGAACTGT  
TTACCCTCCTCTATCAAGAAATCTTGCTCATAAGGCCATCTGTAGATTTAGCAATTTTTTCACTTC  
ATTTAGCTGGAATTTTCATCCATCTTAGGAGCTATTAATTTTATTACTACAATTTAATATACGATGA  
GAAGGAATACAAATAGAACGTCTTCTTTATTCGTTTGATCTGTATTTTATTACAGCAATTTCTTTACT  
TTTATCCTTACCTGTCTCGCCGGAGCCATTACTATATTACTAACTGACCGAAATTTCAATACTACAT  
TTTTTGACCAAGAGGAGGA

>tetricus1

CGAACAGAAGTAGGACAACCAGGGTCCCTCCTAAATGATGATCAACTATATAATGTAATTGTTACAGC  
TCACGCATTTGTTATAATTTTTCTTCTTGTATACCACTTATAATTGGAGGATTTGGAACTGATTAG  
TTCCCTTAATACTAGGAGCACCAGATATAGCATTCCACGAATAAATAATATAAGCTTCTGACTCCTA

CCCCCTTCTCTAACTCTTCTTCTTTTCATCTGCAGCAGTCGAAAGAGGTGCAGGTACCGGATGAACCGT  
TTATCCACCTCTTTCTAGAAATTTAGCTCATATAGGACCTTCTGTTGATCTAGCAATTTTCTCACTTC  
ACTTAGCAGGAATTTTCATCAATTCTTGGAGCCATCAACTTTATTACAACCTATTATTAATATACGATGA  
GAAGGTATATTAATAGAACGACTTCCACTATTTGTATGATCTGTCTTTATTACCGCAATTTTACTACT  
ACTATCATTACCAGTACTCGCTGGAGCAATTACTATACTTTTAACTGACCGAAATTTTAATACTACTT  
TTTTTGATCCAAGTGGAGGA

>tetricus2

CGAACAGAACTAGGACAACCAGGGTCCCTCCTAAATGATGATCAACTATATAATGTAATTGTTACAGC  
TCACGCATTTGTTATAATTTTCTTTCTTGTATACCAGTTATAATTGGAGGATTTGGAAACTGATTAG  
TTCCTTTAATACTAGGAGCACCAGATATAGCATTCCCACGAATAAATAATATAAGCTTCTGACTCCTA  
CCCCCTTCTCTTACTCTTCTTCTTTTCATCTGCAGCAGTCGAAAGAGGTGCGGGTACCGGATGAACCGT  
TTATCCACCTCTTTCAAGAAATTTAGCTCATATAGGACCTTCTGTTGATCTAGCCATTTTCTCACTTC  
ACTTAGCAGGAATTTTCATCAATTCTTGGAGCCATCAACTTTATTACAACCTATTATTAATATACGATGA  
GAAGGTATATTAATAGAACGACTTCCACTATTCGATGATCTGTCTTTATTACCGCAATTTTACTACT  
ACTATCATTACCAGTACTCGCTGGAGCAATTACTATACTTTTAACTGACCGAAATTTTAATACTACT  
TTTTTGATCCAAGTGGAGGA

>vulgaris1

CGAACAGAACTAGGTCAACCAGGATCCCTCCTAAATGATGATCAATTATATAATGTAATTGTTACAGC  
TCACGCATTTGTTATAATTTTTTCTTGTATACCAGTTATAATCGGAGGATTTGGAAACTGATTAG  
TTCCTTTAATACTAGGAGCACCAGATATAGCATTCCCACGAATAAATAATATAAGCTTCTGACTCTTA  
CCTCCTTCTCTTACTCTTCTCCTTTTCATCTGCAGCAGTTGAAAGAGGCGCAGGTACCGGATGAACCGT  
TTACCCGCCTCTTTCTAGAAATTTAGCTCATATAGGACCTTCTGTTGATCTAGCCATTTTCTCACTTC  
ACTTAGCAGGTATTTTCATCAATCCTTGGAGCCATCAACTTTATTACAACCTATTATTAATATACGATGA  
GAAGGTATATTAATAGAACGACTTCCACTATTTGTATGATCTGTATTTATTACCGCAATTTTACTATT  
ACTATCATTACCTGACTCGCTGGAGCAATTACTATACTTTTAACTGACCGAAATTTTAATACTACTT  
TTTTTGATCCTAGTGGAGGA

>vulgaris2

CGAACAGAACTAGGACAACCAGGATCCCTCCTAAATGACGATCAACTATATAATGTAATTGTTACAGC  
TCACGCATTTGTTATAATTTTTTCTTGTATACCAGTTATAATTGGAGGATTCGGAAACTGATTAG  
TTCCTTTAATACTAGGAGCACCAGATATAGCATTCCCACGAATAAATAACATAAGCTTTTACTCTTA  
CCCCCTTCTCTCACTCTTCTCCTTTTCATCTGCAGCAGTTGAAAGAGGTGCAGGTACCGGGTGAACCGT  
TTACCCCTCCTCTTTCAAGAAATTTAGCTCATATAGGACCTTCTGTTGATCTAGCCATTTTCTCACTTC  
ACTTAGCAGGTATTTTCATCAATTCTTGGAGCCATCAACTTTATTACAACCTATTATTAATATACGATGA  
GAAGGTATATTAATAGAACGACTCCCCTACTATTTGTATGATCTGTCTTTATTACCGCAATTTTACTATT  
ACTATCATTACCAGTACTTGGCTGGAGCAATTACTATACTTTTAACTGATCGAAATTTTAATACCACAT  
TTTTTGATCCAAGAGGAGGA

>vulgaris3

CGAACAGAACTAGGACAACCAGGATCCCTCCTAAATGACGATCAACTATATAATGTAATTGTTACAGC  
TCACGCATTTGTTATAATTTTTTCTTGTATACCAGTTATAATTGGAGGATTCGGAAACTGATTAG  
TTCCTTTAATACTAGGAGCACCAGATATAGCATTCCCACGAATAAATAACATAAGCTTTTACTCTTA  
CCCCCTTCTCTCACTCTTCTCCTTTTCATCTGCAGCAGTTGAAAGAGGTGCAGGTACCGGGTGAACCGT  
TTACCCCTCCTCTTTCAAGAAATTTAGCTCATATAGGACCTTCTGTTGATCTAGCCATTTTCTCACTTC  
ACTTAGCAGGTATTTTCATCAATTCTTGGAGCCATCAACTTTATTACAACCTATTATTAATATACGATGA  
GAAGGTATATTAATAGAACGACTCCCCTACTATTTGTATGATCTGTCTTTATTACCGCAATTTTACTATT  
ACTATCATTACCAGTACTTGGCTGGAGCAATTACTATACTTTTAACTGATCGAAATTTTAATACCACAT  
TTTTTGATCCAAGAGGAGGA

>vulgaris4

CGAACAGAACTAGGACAACCAGGATCCCTCCTAAATGACGATCAACTATATAATGTAATTGTTACAGC  
TCACGCATTTGTTATAATTTTTTCTTGTATACCAGTTATAATTGGAGGATTCGGAAACTGATTAG  
TTCCTTTAATACTAGGAGCACCAGATATAGCATTCCCACGAATAAATAACATAAGCTTTTACTCTTA  
CCCCCTTCTCTCACTCTTCTCCTTTTCATCTGCAGCAGTTGAAAGAGGTGCAGGTACAGGATGAACCGT  
TTACCCACCTCTTTCAAGAAATTTAGCTCATATAGGACCTTCTGTTGATCTAGCCATTTTCTCACTTC  
ACTTAGCAGGTATTTTCATCAATTCTTGGAGCCATCAACTTTATTACAACCTATTATTAATATACGATGA  
GAAGGTATATTAATAGAACGACTTCCACTATTTGTGTGATCTGTCTTTATTACCGCAATTTTACTATT

ACTATCATTACCAGTACTTGCTGGAGCAATTACTATACTTTTAACTGATCGAAATTTTAAATACCACAT  
TTTTTGATCCAAGAGGAGGA

>muslonlongi

CGAACAGAACTAGGACAACCTGGATCTTTATTAACGATGATCAACTTTATAACGTCATTGTTACCGC  
CCACGCTTTTGTAAATAATTTTCTTTTGTAGTTATACCCGTAATAATCGGAGGTTTGGAAACTGATTAG  
TCCCCTTAATATTGGGAGCACCAGATATAGCATTCCACGAATAAATAATATAAGATTTTGTACTT  
CCCCCATCTTTAACCTTCTCTTGACCTCAGCAGCAGTAGAAAGGGGAGCAGGAACAGGTTGAACTGT  
TTATCCTCCATTATCAAGAAATTTAGCCACATGGGACCATCTGTAGATCTAGCAATTTTTTCTCTTC  
ACTTAGCAGGTATCTCCTCCATTTTAGGAGCCATTAATTTTATCACAACCATTATCAACATACGATGA  
GAAGGTATACAAATAGAACGTCTTCTTTATTTGTATGATCAGTTCTAATTACAGCAATCCTACTTCT  
ATTATCTTACCAGTATTAGCAGGTGCAATTACTATACTTCTCACTGACCGTAATTTCAACACAACCT  
TTTTTGATCCAAGAGGAGGA

>musyaquinae

CGAACAGAACTAGGACAACCTGGATCTTTATTAATGATGACCAACTTTATAATGTTATTGTCACTGC  
CCACGCTTTTGTAAATAATTTTTTCTTAGTTATACCCGTAATAATTGGAGGATTTGGAAACTGATTAG  
TTCTTTAATATTAGGAGCACCAGATATAGCATTCCACGAATAAATAATATAAGATTTTGTACTC  
CCTCCATCTTTAACCTTCTCTTAACCTCAGCAGCAGTAGAAAGAGGAGCAGGAACAGGTTGAACCGT  
TTACCCTCCATTATCTAGAAATTTAGCTCATATAGGACCATCTGTAGATCTAGCAATTTTTCTCTTC  
ACTTAGCGGCATCTCCTCTATTTTAGGAGCAATTAATTTTATTACAACCATTATTAATATACGATGA  
GAAGGAATACAAATAGAACGCCTTCTTTATTTGTATGATCAGTTCTAATCACAGCAATCCTACTTCT  
TCTATCCTTACCAGTATTAGCAGGTGCAATTACTATACTTCTCACTGACCGTAATTTAATACAACCT  
TTTTTGATCCTAGTGGAGGA

>musjanuari

CGAACAGAACTAGGACAACCTGGTTCCTACTAAATGATGATCAACTCTATAACGTCATTGTTACTGC  
TCACGCTTTTGTAAATAATTTTCTTCTTAGTTATACCCGTAATAATTGGAGGTTTGGTAATTGATTAG  
TTCCCTTAATATTAGGAGCTCCAGACATAGCATTCCACGAATAAATAACATAAGATTTTGTACTT  
CCCCCATCTTTAACCTTCTTAACTCAGCAGCAGTAGAAAGAGGAGCAGGAACAGGTTGAACTGT  
TTATCCTCCATTATCTAGAAATTTAGCTCACATAGGACCATCTGTGGATCTAGCAATTTTTTCCCTTC  
ACTTAGCAGGTATTTCTCTATTTTAGGAGCCATTAATTTTATTACAACCTATTATTAATATACGATGA  
GAAGGAATACAAATAGAACGTCTTCTTTATTTGTATGATCAGTTTAAATTACAGCAATCCTACTTCT  
ATTATCTTACCAGTATTAGCAGGTGCAATTACTATACTTCTCACTGACCGTAATTTAATACAACCT  
TTTTTGACCAAGTGGAGGA

>musakambe

CGAACAGAACTAGGACAACCTGGATCTTTATTAACGATGATCAACTTTATAACGTCATTGTTACCGC  
CCATGCTTTTGTAAATAATTTTCTTTTGTAGTTATACCCGTAATAATCGGAGGATTTGGAAACTGATTAG  
TCCCCTTAATGTTGGGAGCACCAGATATAGCATTCCACGAATAAATAATATAAGATTTTGTACTT  
CCCCCATCTTTAACCTTCTCTTAACCTCAGCAGCAGTAGAAAGAGGAGCAGGAACAGGTTGAACTGT  
TTATCCTCCATTATCAAGAAATTTAGCCACATGGGACCATCTGTAGATCTAGCAATTTTTTCTCTTC  
ACTTAGCAGGTATCTCCTCCATTTTAGGAGCCATTAATTTTATCACAACCATTATCAACATACGATGA  
GAAGGTATACAAATAGAACGTCTTCTTTATTTGTATGATCAGTTCTAATTACAGCAATCCTACTTCT  
ATTATCTTACCAGTATTAGCAGGTGCAATTACTATACTTCTCACTGACCGTAATTTCAACACAACCT  
TTTTTGATCCAAGAGGAGGA

>whitev

CGAACAGAACTAGGCCAACCAGGATCTCTATTAATGATGACCAATTATATAATGTAATTGTAACAGC  
CCATGCTTTTGTAAATAATTTTTTCTAGTTATACCTGTAATAATTGGAGGATTTGGAAATTGTTAG  
TACCTTTAATATTAGGAGCCCCTGATATAGCTTTTCTCGAATAAATAATATAAGATTTTGTACTT  
CCCCCTCATTAACACTACTTTTATCTTCTCAGCTGCAGTTGAAAGAGGTGTAGGAACCGGATGAACTGT  
ATATCCCCACTCTCAAGAAATTTAGCTCATATAGGACCTCAGTTGATCTTGCTATTTTTTCTCTCC  
ATTTAGCTGGTATTTTATCAATTCTTGGAGCTATTAATTTTATTACTACTATTATTAATATACGATGA  
GAAGGAATATAATAGAACGCCTTCTTTATTTGTTTGTATGATCAGTTTATTACAGCAGTCTACTACT  
TTTATCACTCCAGTTTTAGCGGGTCAATTACTATATTATTAACAGATCGAACTTCAACACTACAT  
TTTTTGATCCAAGAGGTGGA
