# Supplementary material for: A biogeographic framework of octopod species diversification: the role of the Isthmus of Panama
Source: PeerJ journal article supplement (doi:10.7717/peerj.8691), 2020-03-27
Supplement: SUPPLEMENTAL_S3_EF.pdf [file SUPPLEMENTAL_S3_EF.pdf]

>hummelinck1

CTTGGTACAGCGTTGGGCGATTGAACGGAAAGAGGGACGGCAAACCCCTCTTCAATGCCTTGGATTC  
TATTATTCCCCGCAGAGACCAACGGAGAGACCACTGAGATTGCCTCTGCAAGATGTCTATAAGATAG  
GTGGTATTGGTACCGTCCCTGTCGGCAGAGTCGAGACCGGTATCTTGAAGCCTGGTATCGTCGTAACA  
TTTGCACCTGCCAATGTATCCACTGAGGTTAGTTTTTTGCTTAGGTGAAGTCTGTAGAGATGCATCAC  
GAATCACTTGTAGAGGCTCTGCCAGGAGACAACGTTGGCTTTAACGTGAAGAACGTATCTGTGAAAGA  
TCTTCGTCGTGGGTATGTGGCTGGAGACACCAAGTGCAGCCTCCTAAGGAAACCAAGTCCTTTGAGG  
CTCAGGTATGTCGTGAATGTATTTAATTTTTCT

>maya

CTTGGTACAGCGTTGGTTCGATTGAACGGAAAGAGGGACGGCAAACCCCTCTTCAATGCCTTGGATTC  
TATTATTCCCCGCAGAGACCAACGGAGAGACCACTGAGATTGCCTCTGCAAGATGTCTATAAGATAG  
GTGGTATTGGTACCGTCCCTGTCGGCAGAGTCGAGACCGGTATCTTGAAGCCTGGTATCGTCGTAACA  
TTTGCACCTGCCAATGTATCCACTGAGGTTAGTTTTTTGCTTAGGTGAAGTCTGTAGAGATGCATCAC  
GAATCACTTGTAGAGGCTCTGCCAGGAGACAACGTTGGCTTTAACGTGAAGAACGTATCTGTGAAAGA  
TCTTCGTCGTGGGTATGTGGCTGGAGACAGCAGGGTCGATCCTCCTAAGGAAACCAAGTCCTTTGAGG  
CTCAGGTATGTCGTGAATGTATTTAATTTTTCT

>maya2

CTTGGTACAGCGTTGGTTCGATTGAACGGAAAGAGGGACGGCAAACCCCTCTTCAATGCCTTGGATTC  
TATTATTCCCCGCAGAGACCAACGGAGAGACCACTGAGATTGCCTCTGCAAGATGTCTATAAGATAG  
GTGGTATTGGTACCGTCCCTGTCGGCAGAGTCGAGACCGGTATCTTGAAGCCTGGTATCGTCGTAACA  
TTTGCACCTGCCAATGTATCCACTGAGGTTAGTTTTTTGCTTAGGTGAAGTCTGTAGAGATGCATCAC  
GAATCACTTGTAGAGGCTCTGCCAGGAGACAACGTTGGCTTTAACGTGAAGAACGTATCTGTGAAAGA  
TCTTCGTCGTGGGTATGTGGCTGGAGACAGCAGGGTCGATCCTCCTAAGGAAACCAAGTCCTTTGAGG  
CTCAGGTATGTCGTGAATGTATTTAATTTTTCT

>bimaculoides1

CTTGGTACAAAGGATGGTTCGATAGAGAGAAAGAGGGGCGGCCAAACCCCTCTTCAATGCCTTGGATTC  
TATTATTCCCCGCAGAGACCAACGGAGAGACCATTGAGATTGCCCTGCAAGATGTCTACAAGATAG  
GTGGTATTGGTACCGTCCCGTCGGCAGAGTCGAGACCGGTATCTTGAAGCCTGGTATCGTCGTAACA  
TTTGCACCTGCCAATATATCCACTGAGGTTAGTTTTTTGCTTAGGTGAAGTCTGTAGAAATGCATCAC  
GAGTCACTTATAGAAGCTCTGCCAGGAGATAACGTTGGTTTTAACGTTAAGAACGTATCGGTTAAGGA  
TCTTCGTCGTGGATATGTGGCTGGAGACAGCAAGAACGATCCCCCTAGGGAAACGAAGAAGTTTGAGG  
CTCAGGTTTGTTCGTGAATGTATTTAATTTTTCT

>vulgaris4

CTTGGTACGAAGGCTGGGAAATTGAGAGGAAAGAGGGGAGGGCAATACCCTCTTCAATGCCTTGGATTC  
TATTATTCCGCCGCAGAGACCAACGGAGAGACCATTGAGATTGCCCTGCAAGATGTCTACAAGATAG  
GTGGTATTGGTACCGTCCCTGTTGGCAGAGTCGAGACCGGTGTCTTGAAGCCTGGTACCGTCGTGACA  
TTTGCACCTGCCAATGATCCACTGAGGTTAGTTTTTTGCTTAGGTGAAGTCTGTAGAGATGCACCAC  
GAGTCACTTCCAGAAGCTAACCCAGGAGACAACGTTGGTTTTAACGTTAAGAACGTATCTGTAAAGGA  
TCTTCGTCGTGGGTATGTGGCTGGTGACAGCAAGAACGACCCTCCTAAGGAAACGAAGTGCTTTGATG  
CCCAGGTATGTCGTGATTGTGTTAATTTTTCT

>vulgaris2

CTTGGTACGATGGCTGGGAAATTGAGAGGAAAGAGGGGAGGGCAGTACCCTCTTCAATGCCTTGGATTC  
TATTATTCCGCCGCAGAGACCAACGGAGAGACCATTGAGATTGCCCTGCAAGATGTCTACAAGATAG  
GTGGTATTGGTACCGTCCCTGTTGGCAGAGTCGAGACCGGTGTCTTGAAGCCTGGTACCGTCGTGACA  
TTTGCACCTGCCAATGATCCACTGAGGTTAGTTTTTTGCTTAGGTGAAGTCTGTAGAGATGCACCAC  
GAGTCACTTCCAGAAGCTAACCCAGGAGACAACGTTGGTTTTAACGTTAAGAACGTATCTGTAAAGGA  
TCTTCGTCGTGGGTATGTGGCTGGTGACAGCAAGAACGACCCTCCTAAGGAAACGAAGTGCTTTGATG  
CCCAGGTATGTCGTGATTGTGTTAATTTTTCT

>insularis1

CTTGGTACACCGTTGGTTCGATTGAACGGAAAGAGGGGCGGCCAAACCCCTCTTCAATGCCTTGGATTC  
TATTATTCCCCGCAGAGACCAACGGAGAGACCACTGAGATTGCCTCTGCAAGATGTCTATAAGATAG  
GTGGTATTGGTACCGTCCCTGTCGGCAGAGTCGAGACCGGTATCTTGAAGCCTGGTATCGTCGTAACA  
TTTGCACCTGCCAATGTATCCACTGAGGTTAGTTTTTTGCTTAGGTGAAGTCTGTAGAGATGCATCAC  
GAATCACTTGTAGAGGCTCTGCCAGGAGACAACGTTGGCTTTAACGTGAAGAACGTATCTGTGAAAGA

TCTTCGTCGTGGGTATGTGGCTGGAGACAGCAAGAGCGATCCACCTAAGGAAACCAAGTCCTTTGAGG  
CTCAGGTATGTCGTGAATGTATTTAATTTTTCT

>insularis4

CTTGGTACACCGTTGGTTCGACTGAACGGAAAGAGGGGCGGCAAACCCCTTTCAATGCCTTGGATTC  
TATTATTCCCCCGCAGAGACCAACGGAGAGACCACTGAGATTGCCTCTGCAAGATGTCTATAAGATAG  
GTGGTATTGGTACCGTCCCTGTTCGGCAGAGTTCGAGACCGGTATCTTGAAGCCTGGTATCGTCGTAACA  
TTTGCACCTGCCAATGTATCCACTGAGGTTAGTTTTTTGCTTAGGTGAAGTCTGTAGAGATGCATCAC  
GAATCACTTGTAGAGGCTCTGCCAGGAGACAACGTTGGCTTTAACGTGAAGAACGTATCTGTGAAAGA  
TCTTCGTCGTGGGTATGTGGCTGGAGACAGCAAGAGCGATCCACCTAAGGAAACCAAGTCCTTTGAGG  
CTCAGGTATGTCGTGAATGTATTTAATTTTTCT

>insularis5

CTTGGTACACCGTTGGTTCGATTGAACGGAAAGAGGGGCGGCAAACCCCTTTCAATGCCTTGGATTC  
TATTATTCCCCCGCAGAGACCAACGGAGAGACCACTGAGATTGCCTCTGCAAGATGTCTATAAGATAG  
GTGGTATTGGTACCGTCCCTGTTCGGCAGAGTTCGAGACCGGTATCTTGAAGCCTGGTATCGTCGTAACA  
TTTGCACCTGCCAATGTATCCACTGAGGTTAGTTTTTTGCTTAGGTGAAGTCTGTAGAGATGCATCAC  
GAATCACTTGTAGAGGCTCTGCCAGGAGACAACGTTGGCTTTAACGTGAAGAACGTATCTGTGAAAGA  
TCTTCGTCGTGGGTATGTGGCTGGAGACAGCAAGAGCGATCCACCTAAGGAAACCAAGTCCTTTGAGG  
CTCAGGTATGTCGTGAATGTATTTAATTTTTCT

>vulgaris1

CTTGGTACGAAGGCTGGGAAATTGAGAGGAAAGAGGGAGGGCAATACCCTCTTCAATGCCTTGGATTC  
TATTATTCCGCCGCAGAGACCAACGGAGAGACCATTGAGATTGCCCTGCAGGATGTCTACAAGATAG  
GTGGTATTGGTACCGTCCCTGTTGGCAGAGTTCGAGACCGGTGTCTTGAAGCCTGGTACCGTCGTGACA  
TTTGCACCTGCCATGGTATCCACTGAGGTTAGTTTTTTGCTTAGGTGAAGTCTGTAGAGATGCACCAC  
GAGTCACTTCCAGAAGCTAACCCAGGAGACAACGTTGGTTTTAACGTTAAGAACGTATCTGTAAAGGA  
TCTTCGTCGTGGGTATGTGGCTGGTGACAGCAAGAACGACCCTCCTAAGGAAACGAAGTGCTTTGATG  
CCCAGGTATGTCGTGATTGTGTTAATTTTTCT

>vulgaris3

CTTGGTACGATGGCTGGGAAATTGAGAGGAAAGAGGGAGGGCAGTACCCTCTTCAATGCCTTGGATTC  
TATTATTCCGCCGCAGAGACCAACGGAGAGACCATTGAGATTGCCCTGCAGGATGTCTACAAGATAG  
GTGGTATTGGTACCGTCCCTGTTGGCAGAGTTCGAGACCGGTGTCTTGAAGCCTGGTACCGTCGTGACA  
TTTGCACCTGCCATGGTATCCACTGAGGTTAGTTTTTTGCTTAGGTGAAGTCTGTAGAGATGCACCAC  
GAGTCACTTCCAGAAGCTAACCCAGGAGACAACGTTGGTTTTAACGTTAAGAACGTATCTGTAAAGGA  
TCTTCGTCGTGGGTATGTGGCTGGTGACAGCAAGAACGACCCTCCTAAGGAAACGAAGTGCTTTGATG  
CCCAGGTATGTCGTGATTGTGTTAATTTTTCT

>tetricus1

CTTGGTACGAAGGCTGGGAAATTGAGAGGAAAGAGGGAGGGCAATACCCTCTTCAATGCCTTGGATTC  
TATTATTCCGCCGCAGAGACCAACGGAGAGACCATTGAGATTGCCCTGCAGGATGTCTACAAGATAG  
GTGGTATTGGTACCGTCCCTGTTGGCAGAGTTCGAGACCGGTGTCTTGAAGCCTGGTACCGTCGTGACA  
TTTGCACCTGCCATGGTATCCACTGAGGTTAGTTTTTTGCTTAGGTGAAGTCTGTAGAGATGCACCAC  
GAGTCACTTCCAGAAGCTAACCCAGGAGACAATGTTGGTTTTAACGTTAAGAACGTATCTGTAAAGGA  
TCTTCGTCGTGGGTATGTGGCTGGTGACAGCAAGAACGACCCTCCTAAGGAAACGAAGTGCTTTGATG  
CCCAGGTATGTCGTGATTGTGTTAATTTTTCT

>tetricus2

CTTGGTACGATGGCTGGGAAATTGAGAGGAAAGAGGGAGGGCAATACCCTCTTCAATGCCTTGGATTC  
TATTATTCCGCCGCAGAGACCAACGGAGAGACCATTGAGATTGCCCTGCAGGATGTCTACAAGATAG  
GTGGTATTGGTACCGTCCCTGTTGGCAGAGTTCGAGACCGGTGTCTTGAAGCCTGGTACCGTCGTGACA  
TTTGCACCTGCCATGGTATCCACTGAGGTTAGTTTTTTGCTTAGGTGAAGTCTGTAGAGATGCACCAT  
GAGTCACTTCCAGAAGCTAACCCAGGAGACAACGTTGGTTTTAACGTTAAGAACGTATCTGTAAAGGA  
TCTTCGTCGTGGGTATGTGGCTGGTGACAGCAAGAACGACCCTCCTAAGGAAACGAAGTGCTTTGATG  
CCCAGGTATGTCGTGATTGTGTTAATTTTTCT
