# Supplementary material for: A biogeographic framework of octopod species diversification: the role of the Isthmus of Panama
Source: PeerJ journal article supplement (doi:10.7717/peerj.8691), 2020-03-27
Supplement: SUPPLEMENTAL_S4_RHOPOSIN.pdf [file SUPPLEMENTAL_S4_RHOPOSIN.pdf]

>384

GACCTATGGCGGCATCCAAGAAAATGTCCCATAGAAGAGCTTTCCTCATGATTATCTTTGTGTGGATG  
TGGTCCATTGTATGGGCTGTTGGTCCCGTTTTCAACTGGGGAGCCTACGTCCCTGAAGGTATCCTAAC  
ATCTTGCTCTTTTGATTACCTGTCTACTGATTCTAGCACCAAATCTTTCATCTTGTGCATGTACTTCT  
GCGGCTTCATGCTGCCCGTAGTTATCATCGCTTTCTGTTACTTCAACATTGTCATGTCTGTATCCAAC  
CACGAAAAGGAAATGGCTGCCATGGCTAAGAGGTTGAACGCCAAAGAATTGCGTAAGGCACAGGCCGG  
CCAGAGCGCTGAAATGAAACTTGCTAAAATTTCAATGGTAATTATTACCCAATTTATGCTTTTCCTGGT  
CTCCATACGCCATCATCGCTCTTCTTGACAGTTTGGGCCAGCTGAATGGGTTACCCCATACGCAGCC  
GAGTTGCCTGTCTGTTTGCTAAAGCTTCAGCTATCCACAACCCAATTGTCTACTCTGTTTC

>385

GACCTATGGCGGCATCCAAGAAAATGTCCCATAGAAGAGCTTTCCTCATGATTATCTTTGTGTGGATG  
TGGTCCATTGTATGGGCTGTTGGTCCCGTTTTCAACTGGGGAGCCTACGTCCCTGAAGGTATCCTAAC  
ATCTTGCTCTTTTGATTACCTGTCTACTGATTCTAGCACCAAATCTTTCATCTTGTGCATGTACTTCT  
GCGGCTTCATGCTGCCCGTAGTTATCATCGCTTTCTGTTACTTCAACATTGTCATGTCTGTATCCAAC  
CACGAAAAGGAAATGGCTGCCATGGCTAAGAGGTTGAACGCCAAAGAATTGCGTAAGGCACAGGCCGG  
CCAGAGCGCTGAAATGAAACTTGCTAAAATTTCAATGGTAATTATTACCCAATTTATGCTTTTCCTGGT  
CTCCATACGCCATCATCGCTCTTCTTGACAGTTTGGGCCAGCTGAATGGGTTACCCCATACGCAGCC  
GAGTTGCCTGTCTGTTTGCTAAAGCTTCAGCTATCCACAACCCAATTGTCTACTCTGTTTC

>386

GACCTATGGCGGCATCCAAGAAAATGTCCCATAGAAGAGCTTTCCTCATGATTATCTTTGTGTGGATG  
TGGTCCATTGTATGGGCTGTTGGTCCCGTTTTCAACTGGGGAGCCTACGTCCCTGAAGGTATCCTAAC  
ATCTTGCTCTTTTGATTACCTGTCTACTGATTCTAGCACCAAATCTTTCATCTTGTGCATGTACTTCT  
GCGGCTTCATGCTGCCCGTAGTTATCATCGCTTTCTGTTACTTCAACATTGTCATGTCTGTATCCAAC  
CACGAAAAGGAAATGGCTGCCATGGCTAAGAGGTTGAACGCCAAAGAATTGCGTAAGGCACAGGCCGG  
CCAGAGCGCTGAAATGAAACTTGCTAAAATTTCAATGGTAATTATTACCCAATTTATGCTTTTCCTGGT  
CTCCATACGCCATCATCGCTCTTCTTGACAGTTTGGGCCAGCTGAATGGGTTACCCCATACGCAGCC  
GAGTTGCCTGTCTGTTTGCTAAAGCTTCAGCTATCCACAACCCAATTGTCTACTCTGTTTC

>bimaculatus

GACCTATGGCGGCATCCAAGAAAATGTCCCATAGAAGAGCTTTCCTCATGATTATCTTTGTGTGGATA  
TGGTCCATTGTTGGTCTGTGCGGCCCGTCTTCAACTGGGGAGCATAACGTCCCTGAAGGTATTCTTAC  
ATCTTGCTCTTTTGATTACCTGTCTACTGATTCTAGTACCAGATCTTTCATCTTGTGCATGTACTTCT  
GTGGTTTTCATGCTGCCATAATTATCATCGCTTTCTGTTACTTCAACATTGTCATGTCTGTATCCAAC  
CATGAAAAGGAAATGGCTGCCATGGCTAAGAGGTTGAACGCCAAAGAATTGCGTAAGGCCAGGCTGG  
CCAGAGCGCTGAAATGAAACTCGCCAAAATCTCAATGGTAATTATTACCCAATTCATGCTCTCCTGGT  
CTCCATACGCCATCATCGCTCTTCTTGACAGTTTGGGCCAGCTGAATGGGTTACTCCTTATGCAGCT  
GAATTGCCTGTCTGTTTGCTAAAGCTTCAGCTATCCACAACCCAATTGTCTACTCTGTTTC

>bimaculoides1

GACCTATGGCGGCATCCAAGAAAATGTCCCATAGAAGAGCTTTCCTCATGATTATCTTTGTGTGGATA  
TGGTCCATTGTTGGTCTGTGCGGCCCGTCTTCAACTGGGGAGCATAACGTCCCTGAAGGTATTCTTAC  
ATCTTGCTCTTTTGATTACCTGTCTACTGATTCTAGTACCAGATCTTTCATCTTGTGCATGTACTTCT  
GTGGTTTTCATGCTGCCATAATTATCATCGCTTTCTGTTACTTCAACATTGTCATGTCTGTATCCAAC  
CATGAAAAGGAAATGGCTGCCATGGCTAAGAGGTTGAACGCCAAAGAATTGCGTAAGGCCAGGCTGG  
CCAGAGCGCTGAAATGAAACTCGCCAAAATCTCAATGGTAATTATTACCCAATTCATGCTCTCCTGGT  
CTCCATACGCCATCATCGCTCTTCTTGACAGTTTGGGCCAGCTGAATGGGTTACTCCTTATGCAGCT  
GAATTGCCTGTCTGTTTGCTAAAGCTTCAGCTATCCACAACCCAATTGTCTACTCTGTTTC

>bimaculoides2

GACCTATGGCGGCATCCAAGAAAATGTCCCATAGAAGAGCTTTCCTCATGATTATCTTTGTGTGGATA  
TGGTCCATTGTTGGTCTGTGCGGCCCGTCTTCAACTGGGGAGCATAACGTCCCTGAAGGTATTCTTAC  
ATCTTGCTCTTTTGATTACCTGTCTACTGATTCTAGTACCAGATCTTTCATCTTGTGCATGTACTTCT  
GTGGTTTTCATGCTGCCATAATTATCATCGCTTTCTGTTACTTCAACATTGTCATGTCTGTATCCAAC  
CATGAAAAGGAAATGGCTGCCATGGCTAAGAGGTTGAACGCCAAAGAATTGCGTAAGGCCAGGCTGG  
CCAGAGCGCTGAAATGAAACTCGCCAAAATCTCAATGGTAATTATTACCCAATTCATGCTCTCCTGGT  
CTCCATACGCCATCATCGCTCTTCTTGACAGTTTGGGCCAGCTGAATGGGTTACTCCTTATGCAGCT  
GAATTGCCTGTCTGTTTGCTAAAGCTTCAGCTATCCACAACCCAATTGTCTACTCTGTTTC

>defilippi1

GACCTATGGCGGCATCCAAGAAAATGTCCCATAGAAGAGCTTTCCTCATGATTATCTTTGTGTGGATG  
TGGTCCATTGTTTGGGCTGTTGGCCCCGTCTTCAACTGGGGAGCATACGTCCCTGAAGGTATTCTTAC  
ATCTTGCTCTTTTGATTACCTGTCTACTGATCCTAGTACCAGATCTTTCATCTTGTGCATGTACTTCT  
GTGGTTTCATGCTGCCATTATTATCATCGCTTTCTGTTACTTCAACATTGTCATGTCTGTATCCAAC  
CATGAAAAGGAAATGGCTGCCATGGCTAAGAGGTTGAACGCCAAAGAATTGCGTAAAGCACAGGCTGG  
CCAGAGCGCTGAAATGAACTTGCCAAAATCTCAATGGTAATTATCACCCAATTCATGCTCTCCTGGT  
CTCCATACGCCGTCATTGCTCTTCTTGCCAGTTTGGTCCAGCTGAATGGGTACCCCATATGCAGCT  
GAATTGCCTGTCTCTTCGCTAAAGCCTCAGCTATCCACAACCCAATTGTCTACTCTGTTTC

>defilippi2

GACCTATGGCGGCATCCAAGAAAATGTCCCATAGAAGAGCTTTCCTCATGATTATCTTTGTGTGGATG  
TGGTCCATTGTTTGGGCTGTTGGCCCCGTCTTCAACTGGGGAGCATACGTCCCTGAAGGTATTCTTAC  
ATCTTGCTCTTTTGATTACCTGTCTACTGATCCTAGTACCAGATCTTTCATCTTGTGCATGTACTTCT  
GTGGTTTCATGCTGCCATTATTATCATCGCTTTCTGTTACTTCAACATTGTCATGTCTGTATCCAAC  
CATGAAAAGGAAATGGCTGCCATGGCTAAGAGGTTGAACGCCAAAGAATTGCGTAAAGCACAGGCTGG  
CCAGAGCGCTGAAATGAACTTGCCAAAATCTCAATGGTAATTATCACCCAATTCATGCTCTCCTGGT  
CTCCATACGCCGTCATTGCTCTTCTTGCCAGTTTGGTCCAGCTGAATGGGTACCCCATATGCAGCT  
GAATTGCCTGTCTCTTCGCTAAAGCCTCAGCTATCCACAACCCAATTGTCTACTCTGTTTC

>digueti

GACCTATGGCGGCATCCAAGAAAATGTCCCATAGAAGAGCTTTCCTCATGATTATCTTTGTGTGGATG  
TGGTCCATTATTTGGGCTGTCGGTCCCGTCTTCAACTGGGGAGCATACGTCCCTGAAGGTATTCTCAC  
ATCTTGCTCTTTTGATTACCTGTCTACTGATTCTAGCACAAAGATCTTTCATCTTGTGCATGTACTTCT  
GTGGTTTCATGTTACCCGTAGTTATCATCGCTTTCTGTTACTTCAACATTGTCATGTCTGTATCCAAC  
CATGAAAAGGAAATGGCTGCCATGGCTAAGAGGTTGAACGCCAAAGAATTGCGTAAAGCACAGGCTGG  
CCAGAGCGCTGAAATGAACTTGCCAAAGATTTCAATGGTAATTATTACCCAATTCATGCTTTCTGGT  
CTCCATACGCTATCATCGCTCTTCTTGACAGTTTGGGCCAGCTGAATGGGTACCCCATACGCAGCT  
GAATTACCTGTCTCTTGCTAAAGCCTCAGCTATCCACAACCCAATTGTCTACTCTGTTTC

>dofleini

GACCTATGGCAGCGTCCAAAAAATGTCCCATAGAAGAGCTTTCCTCATGATTATCTTTGTGTGGATG  
TGGTCCATTGTTTGGTCACTCGGACCCGTCTTCAACTGGGGAGCATACGTCCCGAAGGTATTCTCAC  
ATCCTGCTCTTTGATTACCTCTCCACTGATCCTAGTACCAGATCTTTCATCTTGTGCATGTACTTCT  
GTGGTTTCATGCTGCCATAATTATCATCGCTTTCTGTTATTTCAACATTGTCATGTCTGTATCCAAC  
CACGAAAAGGAAATGGCTGCCATGGCAAAGAGGTTGAATGCCAAAGAATTGCGTAAAGCACAGGCTGG  
TGCGAGCGCTGAAATGAACTTGCCAAAATTTCAATGGTAATTATTACCCAATTCATGCTTTCTGGT  
CTCCATACGCCATCATCGCTCTTCTTGACAGTTTGGGCCAGCTGAATGGGTACTCCATACGCAGCC  
GAATTGCCTGTACTGTTTGCTAAAGCCTCAGCTATCCACAACCCAATTGTCTACTCTGTTTC

>fitchi

GACCTATGGCGGCATCCAAGAAAATGTCCCATAGACGAGCTTTCCTCATGATTATCTTTGTGTGGATG  
TGGTCCATTATTTGGGCTGTCGGTCCCGTCTTCAACTGGGGAGCATACGTCCCTGAAGGTATTCTCAC  
ATCTTGCTCTTTTGATTATCTGTCTACCGATTCTAGCACAAAGATCTTTCATCTTGTGCATGTACTTCT  
GTGGTTTCATGCTACCCGTAGTTATCATCGCTTTCTGTTATTTCAACATTGTCATGTCTGTATCCAAC  
CATGAAAAGGAAATGGCTGCCATGGCTAAGAGGTTGAACGCCAAAGAATTGCGTAAAGCACAGGCTGG  
CCAGAGCGCTGAAATGAACTTGCCAAAGATTTCAATGGTAATTATTACCCAATTCATGCTTTCTGGT  
CTCCATACGCCATCATCGCTCTTCTTGACAGTTTGGGCCAGCTGAATGGGTACTCCATACGCAGCC  
GAATTACCTGTCTGTTTGCTAAAGCCTCAGCTATCCACAACCCAATTGTCTACTCTGTTTC

>musyaquinae

GACCTATGGCAGCGTCCAAAAAGATGTCCCATAGAAAAGCTTTCCTCATGATTATCTTTGTGTGGATG  
TGGGCCATTGTTTGGGCACTCGGACCCATCTTCAACTGGGGTGCATACGTCCCGAAGGTATTCTCAC  
ATCCTGCTCTTTTGATTACCTCTCCACTGATTCTACTACTAGATCTAACGTCTTGTGCATGTACTTTT  
GTGGTTTCACGATGCCATAGTTATCATCGCTTTCTGTTATTTCAACATTGTCATGTCTGTATCCAAC  
CACGAAAAGGAGATGGCTGCCATGGCAAAGAGGTTGAATGCCAAAGAATTGCGTAAAGCACAGGCTGG  
CCAGAGCTCTGAAATGAACTTGCCAAAATTTGATGGTAATTATTACCCAATTCCTGCTTTCTGGT  
CTCCATACGCCATCGCTCTTCTTGACAGTTTGGACCAGCTGAATGGATTACTCCATACGCAGCT  
GAATTGCCTGTACTGTTTGCTAAAGCCTCAGCTATCCACAACCCAATTGTCTACTCTGTTTC

>muslonlongi

GACCTATGGCAGCGTCCAAAAAGATGTCCCATAGAAAAGCTTTCCTCATGATTATCTTTGTGTGGATG  
TGGGCCATTGTTTGGGCAGTCGGACCCATCTTCAACTGGGGTGCATACGTCCCGGAAGGTATTCTCAC  
ATCCTGCTCTTTTGATTACCTCTCCACTGATTCTACTACTAGATCTAACATCTTGTGCATGTACTTCT  
GTGGTTTCATGATGCCCATAGTTATCATCGTTTTYTGTTATTTCAACATTGTCATGTCTGTATCCAAC  
CACGAAAAGGAGATGGCTGCCATGGCAAAGAGGTTGAATGCCAAAGAATTGCGTAAAGCACAGGCTGG  
CCAGAGCGCTGAAATGAAACTTGCCAAAATTTGATGATAATTATTACCCAATTCTTGCTTTCCTGGT  
CTCCATACGCCATCGTCGCTCTTCTTGACAGTTTGGGCCAGCTGAATGGATTACTCCATACGCAGCT  
GAATTGCCTGTACTGTTTGCTAAAGCTTCAGCTATCCACAACCCAATTGTCTACTCTGTTTC

>musakambe

GACCTATGGCAGCGTCCAAAAAGATGTCCCATAGAAAAGCTTTCCTCATGATTATCTTTGTGTGGATG  
TGGGCCATTGTTTGGGCAGTCGGACCCATCTTCAACTGGGGTGCATATGTCCCGGAAGGTATTCTCAC  
ATCCTGCTCTTTTGATTACCTCTCCACTGATTCTACTACTAGATCTAACATCTTGTGCATGTACTTCT  
GTGGTTTCATGATGCCCATAGTTATCATCGTTTTCTGTTATTTCAACATTGTCATGTCTGTATCCAAC  
CACGAAAAGGAGATGGCTGCCATGGCAAAGAGGTTGAATGCCAAAGAATTGCGTAAAGCACAGGCTGG  
CCAGAGCGCTGAAATGAAACTTGCCAAAATTTGATGATAATTATTACCCAATTCTTGCTTTCCTGGT  
CTCCATACGCCATCGTCGCTCTTCTTGACAGTTTGGGCCAACTGAATGGATTACTCCATTAGCAGCT  
GAATTGCCTGTACTGTTTGCTAAAGCTTCAGCTATCCACAACCCAATTGTCTACTCTGTTTC

>musjanuari

GACCTATGGCAGCGTCCAAAAAGATGTCCCATAGAAAAGCTTTCCTCATGATTATCTTTGTGTGGATG  
TGGGCCATTGTTTGGGCAGTCGGACCCATCTTCAACTGGGGTGCATACGTCCCGGAAGGTATTCTCAC  
ATCCTGCTCTTTTGATTACCTCTCCACTGATTCTAGTACAAGATCTTTCATCTTGTGCATGTACTTCT  
GTGGTTTCACAATGCCCATAGTTATCATCGTTTTCTGTTATTTCAACATTGTCATGTCTGTATCCAAC  
CACGAAAAGGAGATGGCTGCCATGGCAAAGAGGTTGAATGCCAAAGAATTGCGTAAAGCACAGGCTGG  
CCAGAGCGCTGAAATGAAACTCGCCAAAATTTGATGGTAATTATTACCCAATTCTTGTTTTCTGGT  
CTCCATACGCCATCGTCGCTCTTCTTGACAGTTTGGGCCAACTGAATGGGTTACTCCATACGCAGCT  
GAATTGCCTGTACTGTTTGCTAAAGCTTCAGCTATCCACAACCCAATTGTCTACTCTGTTTC

>hummelinck1

GACCTATGGCGGCATCCAAGAAAATGTCCCATAGAAGAGCTTTCCTCATGATTATCTTTGTGTGGATA  
TGGTCCATTGTTTGGTCTGTGCGCCCCGTCTTCAACTGGGGAGCATAACGTCCCTGAAGGTATTCTTAC  
ATCTTGCTCTTTTGATTACCTGTCTACTGATTCTAGTACCAGATCTTTCATCTTGTGCATGTACTTCT  
GTGGTTTCATGCTGCCCGTAGTTATCATCGTTTTCTGCTACTTCAACATTGTCATGTCTGTATCCAAC  
CACGAAAAGGAAATGGCTGCCATGGCTAAGAGGTTGAACGCCAAAGAATTGCGTAAGGCACAGGCTGG  
CCAGAGCGCTGAAATGAAACTCGCCAAAATTTCAATGGTAATTATTACCCAATTCTTGCTCTCCTGGT  
CTCCATACGCCATCATCGCTCTTCTTGACAGTTTGGGCCAGCTGAATGGGTTACTCCTTATGCAGCT  
GAATTGCCTGTCTGTTTGCTAAAGCTTCAGCTATCCACAACCCAATTGTCTACTCTGTTTC

>hummelinck3

GACCTATGGCGGCATCCAAGAAAATGTCCCATAGAAGAGCTTTCCTCATGATTATCTTTGTGTGGATA  
TGGTCCATTGTTTGGTCTGTGCGCCCCGTCTTCAACTGGGGAGCATAACGTCCCTGAAGGTATTCTTAC  
ATCTTGCTCTTTTGATTACCTGTCTACTGATTCTAGTACCAGATCTTTCATCTTGTGCATGTACTTCT  
GTGGTTTCATGCTGCCCGTAGTTATCATCGTTTTCTGCTACTTCAACATTGTCATGTCTGTATCCAAC  
CACGAAAAGGAAATGGCTGCCATGGCTAAGAGGTTGAACGCCAAAGAATTGCGTAAGGCACAGGCTGG  
CCAGAGCGCTGAAATGAAACTCGCCAAAATTTCAATGGTAATTATTACCCAATTCTTGCTCTCCTGGT  
CTCCATACGCCATCATCGCTCTTCTTGACAGTTTGGGCCAGCTGAATGGGTTACTCCTTATGCAGCT  
GAATTGCCTGTCTGTTTGCTAAAGCTTCAGCTATCCACAACCCAATTGTCTACTCTGTTTC

>insularis1

GACCTATGGCGGCATCCAAGAAAATGTCCCATAGAAGAGCTTTCCTCATGATTATCTTTGTGTGGATA  
TGGTCCATTGTTTGGGCTGTGCGCCCCGTCTTCAACTGGGGAGCATAACGTCCCTGAAGGTATTCTTAC  
ATCTTGCTCTTTTGATTACCTGTCTACTGATTCTAGTACCAGATCTTTCATCTTGTGCATGTACTTCT  
GTGGTTTCATGCTGCCCGTAGTTATCATCGTTTTCTGTTACTTCAACATTGTCATGTCTGTATCCAAC  
CACGAAAAGGAAATGGCTGCCATGGCTAAGAGGTTGAACGCCAAAGAATTGCGTAAGGCACAGGCTGG  
CCAGAGCGCTGAAATGAAACTCGCCAAAATTTCAATGGTAATTATTACCCAATTCTTGCTCTCCTGGT  
CTCCATACGCCATCATCGCTCTTCTTGACAGTTTGGGCCAGCTGAATGGGTTACTCCTTATGCAGCT  
GAATTGCCTGTCTGTTTGCTAAAGCTTCAGCTATCCACAACCCAATTGTCTACTCTGTTTC

>insularis4

GACCTATGGCGGCATCCAAGAAAATGTCCCATAGAAGAGCTTTCCTCATGATTATCTTTGTGTGGATA  
TGGTCCATTGTTTGGGCTGTGCGCCCCGTCTTCAACTGGGGAGCATACGTCCCTGAAGGTATTCTTAC  
ATCTTGCTCTTTTGATTACCTGTCTACTGATTCTAGTACCAGATCTTTCATCTTGTGCATGTACTTCT  
GTGGTTTCATGCTGCCCGTAGTTATCATCGCTTTCTGTTACTTCAACATTGTCATGTCTGTATCCAAC  
CACGAAAAGGAAATGGCTGCCATGGCTAAGAGGTTGAACGCCAAAGAATTGCGTAAGGCACAGGCTGG  
CCAGAGCGCTGAAATGAAACTCGCCAAAATTTCAATGGTAATTATTACCCAATTCATGCTCTCCTGGT  
CTCCATACGCCATCATCGCTCTTCTTGACAGTTTGGGCCAGCTGAATGGGTTACTCCTTATGCAGCT  
GAATTGCCTGTCCTGTTTGCTAAAGCTTCAGCTATCCACAACCCAATTGTCTACTCTGTTTC

>insularis5

GACCTATGGCGGCATCCAAGAAAATGTCCCATAGAAGAGCTTTCCTCATGATTATCTTTGTGTGGATA  
TGGTCCATTGTTTGGGCTGTGCGCCCCGTCTTCAACTGGGGAGCATACGTCCCTGAAGGTATTCTTAC  
ATCTTGCTCTTTTGATTACCTGTCTACTGATTCTAGTACCAGATCTTTCATCTTGTGCATGTACTTCT  
GTGGTTTCATGCTGCCCGTAGTTATCATCGCTTTCTGTTACTTCAACATTGTCATGTCTGTATCCAAC  
CACGAAAAGGAAATGGCTGCCATGGCTAAGAGGTTGAACGCCAAAGAATTGCGTAAGGCACAGGCTGG  
CCAGAGCGCTGAAATGAAACTCGCCAAAATTTCAATGGTAATTATTACCCAATTCATGCTCTCCTGGT  
CTCCATACGCCATCATCGCTCTTCTTGACAGTTTGGGCCAGCTGAATGGGTTACTCCTTATGCAGCT  
GAATTGCCTGTCCTGTTTGCTAAAGCTTCAGCTATCCACAACCCAATTGTCTACTCTGTTTC

>joubini3

GACCTATGGCGGCATCTAAGAAAATGTCCCATAGAAGAGCTTTCCTCATGATTATCTTTGTGTGGATG  
TGGTCCATTGTTTGGGCTGTGCGTCCCGTCTTCAACTGGGGAGCATACGTCCCTGAAGGTATTCTCAC  
ATCTTGCTCTTTTGATTACCTGTCTACTGATTCTAACACAAGATCTTTCATCTTGTGCATGTACTTCT  
GTGGTTTCATGTTACCCGTAGTTATCATCGCTTTCTGTTACTTCAACATTGTCATGTCTGTATCCAAC  
CATGAAAAGGAAATGGCTGCCATGGCTAAGAGGTTGAACGCCAAAGAATTGCGTAAGGCACAGGCTGG  
CCAGAGCGCTGAAATGAAACTTGCCAAGATTTCAATGGTAATTATTACCCAATTCATGCTTTCTCCTGGT  
CTCCATACGCCATCATCGCTCTTCTTGACAGTTTGGGCCAGCTGAATGGGTTACCCCATACGCAGCT  
GAATTACCTGTCCTGTTTGCTAAAGCTTCAGCTATCCACAACCCAATTGTCTACTCTGTTTC

>maya

GACCTATGGCGGCATCCAAGAAAATGTCCCATAGAAGAGCTTTCCTCATGATTATCTTTGTGTGGATA  
TGGTCCATTGTTTGGTCTGTGCGCCCCGTCTTCAACTGGGGAGCATACGTCCCTGAAGGTATTCTTAC  
ATCTTGCTCTTTTGATTACCTGTCTACTGATTCTAGTACCAGATCTTTCATCTTGTGCATGTACTTCT  
GTGGTTTCATGCTGCCCGTAGTTATCATCGCTTTCTGTTACTTCAACATTGTCATGTCTGTATCCAAC  
CACGAAAAGGAAATGGCTGCCATGGCTAAGAGGTTGAACGCCAAAGAATTGCGTAAGGCACAGGCTGG  
CCAGAGCGCTGAAATGAAACTCGCCAAAATTTCAATGGTAATTATTACCCAATTCATGCTCTCCTGGT  
CTCCATACGCCATCATCGCTCTTCTTGACAGTTTGGGCCAGCTGAATGGGTTACTCCTTATGCAGCT  
GAATTGCCTGTCCTGTTTGCTAAAGCTTCAGCTATCCACAACCCAATTGTCTACTCTGTTTC

>maya2

GACCTATGGCGGCATCCAAGAAAATGTCCCATAGAAGAGCTTTCCTCATGATTATCTTTGTGTGGATA  
TGGTCCATTGTTTGGTCTGTGCGCCCCGTCTTCAACTGGGGAGCATACGTCCCTGAAGGTATTCTTAC  
ATCTTGCTCTTTTGATTACCTGTCTACTGATTCTAGTACCAGATCTTTCATCTTGTGCATGTACTTCT  
GTGGTTTCATGCTGCCCGTAGTTATCATCGCTTTCTGTTACTTCAACATTGTCATGTCTGTATCCAAC  
CACGAAAAGGAAATGGCTGCCATGGCTAAGAGGTTGAACGCCAAAGAATTGCGTAAGGCACAGGCTGG  
CCAGAGCGCTGAAATGAAACTCGCCAAAATTTCAATGGTAATTATTACCCAATTCATGCTCTCCTGGT  
CTCCATACGCCATCATCGCTCTTCTTGACAGTTTGGGCCAGCTGAATGGGTTACTCCTTATGCAGCT  
GAATTGCCTGTCCTGTTTGCTAAAGCTTCAGCTATCCACAACCCAATTGTCTACTCTGTTTC

>mimus1

GACCTATGGCGGCATCCAAGAAAATGTCCCATAGAAGAGCTTTCCTCATGATTATCTTTGTGTGGATG  
TGGTCCATTGTTTGGTCTGTGCGCCCCGTCTTCAACTGGGGAGCATACGTCCCTGAAGGTATTCTTAC  
ATCTTGCTCTTTTGATTACCTGTCTACTGATTCTAGTACCAGATCTTTCATCTTGTGCATGTACTTCT  
GTGGTTTCATGCTGCCCGTAGTTATCATCGCTTTCTGTTACTTCAACATTGTCATGTCTGTATCCAAC  
CACGAAAAGGAAATGGCTGCCATGGCTAAGAGGTTGAACGCCAAAGAATTGCGTAAGGCACAGGCTGG  
CCAGAGCGCTGAAATGAAACTCGCCAAAATTTCAATGGTAATTATTACCCAATTCATGCTCTCCTGGT  
CTCCATACGCCATCATCGCTCTTCTTGACAGTTTGGGCCAGCTGAATGGGTTACTCCTTATGCAGCT  
GAATTGCCTGTCCTGTTTGCTAAAGCTTCAGCTATCCACAACCCAATTGTCTACTCTGTTTC

>mimus2

GACCTATGGCGGCATCCAAGAAAATGTCCCATAGAAGAGCTTTCCTCATGATTATCTTTGTGTGGATG  
TGGTCCATTGTTTGGTCTGTGCGCCCCGTCTTCAACTGGGGAGCATACGTCCCTGAAGGTATTCTTAC  
ATCTTGCTCTTTTGATTACCTGTCTACTGATTCTAGTACCAGATCTTTCATCTTGTGCATGTACTTCT  
GTGGTTTCATGCTGCCCGTAGTTATCATCGCTTTCTGTTACTTCAACATTGTCATGTCTGTATCCAAC  
CACGAAAAGGAAATGGCTGCCATGGCTAAGAGGTTGAACGCCAAAGAATTGCGTAAGGCACAGGCTGG  
CCAGAGCGCTGAAATGAAACTCGCCAAAATTTCAATGGTAATTATTACCCAATTCATGCTCTCCTGGT  
CTCCATACGCCATCATCGCTCTTCTTGACAGTTTGGGCCAGCTGAATGGGTTACTCCTTATGCAGCT  
GAATTGCCTGTCCTGTTTGCTAAAGCTTCAGCTATCCACAACCCAATTGTCTACTCTGTTTC

>oculifer

GACCTATGGCGGCATCCAAGAAAATGTCCCATAGAAGAGCTTTCCTCATGATTATCTTTGTGTGGATA  
TGGTCCATTGTTTGGTCTGTGCGCCCCGTCTTCAACTGGGGAGCATACGTCCCTGAAGGTATTCTTAC  
ATCTTGCTCTTTTGATTACCTGTCTACTGATCCTAGTACCAGATCTTTCATCTTGTGCATGTACTTCT  
GTGGTTTCATGCTGCCCGTAGTTATCATCGCTTTCTGTTACTTCAACATTGTCATGTCTGTATCCAAC  
CACGAAAAGGAAATGGCTGCCATGGCTAAGAGGTTGAACGCCAAAGAATTGCGTAAGGCACAGGCTGG  
CCAGAGCGCTGAAATGAAACTCGCCAAAATTTCAATGGTAATTATTACCCAATTCATGCTCTCCTGGT  
CTCCATACGCCATCATCGCTCTTCTTGACAGTTTGGGCCAGCTGAATGGGTTACTCCTTATGCAGCT  
GAATTGCCTGTCCTGTTTGCTAAAGCTTCAGCTATCCACAACCCAATTGTCTACTCTGTTTC

>ornatus

GACCTATGGCGGCATCCAAGAAAATGTCCCATAGAAGAGCTTTCCTCATGATTATCTTTGTGTGGATG  
TGGTCCATTGTATGGGCTGTTGGCCCCGTTTTCAACTGGGGAGCCTACGTCCCTGAAGGTATCCTAAC  
ATCTTGCTCTTTTGATTATCTGTCTACTGATTCTAGCACCAAATCTTTCATCTTGTGCATGTACTTCT  
GCGGTTTCATGCTGCCCGTAGTTATCATCGCTTTCTGTTACTTCAACATTGTCATGTCTGTATCCAAC  
CACGAAAAGGAAATGGCTGCCATGGCTAAGAGGTTGAACGCCAAAGAATTGCGTAAGGCACAGGCCGG  
CCAGAGCGCTGAAATGAAACTTGCTAAAATTTCAATGGTAATTATTACCCAATTTATGCTTTCTGGT  
CTCCATACGCCATCATCGCTCTTCTTGACAGTTTGGGCCAGCTGAATGGGTTACCCCATACGCAGCC  
GAGTTGCCTGTCCTGTTTGCTAAAGCTTCAGCTATCCACAACCCAATTGTCTACTCTGTTTC

>vulgaris1

GACCTATGGCGGCATCCAAGAAAATGTCCCATAGAAGAGCTTTCCTCATGATTATCTTTGTGTGGATA  
TGGTCCATTGTTTGGGCTGTGCGCCCCGTCTTCAACTGGGGAGCATACGTCCCTGAAGGTATTCTTAC  
ATCTTGCTCTTTTGATTACCTGTCTACTGATTCTAATACCAGATCTTTTATCTTGTGCATGTACTTCA  
TGGGTTTCATGCTGCCCGTAGTTATCATCGCTTTCTGTTACTTCAACATTGTCATGTCTGTATCCAAC  
CACGAAAAGGAAATGGCTGCCATGGCTAAGAGGTTGAATGCCAAAGAATTGCGTAAGGCACAGGCTGG  
CCAGAGCGCTGAAATGAAACTTGCCAAAATTTCAATGGTAATTATTACCCAATTCATGCTCTCCTGGT  
CTCCATACGCCGTCATCGCTCTTCTTGACAGTTTGGGCCAGCTGAATGGGTTACTCCTTATGCAGCT  
GAATTGCCTGTCCTGTTTGCTAAAGCTTCAGCTATCCACAACCCAATTGTCTACTCTGTTTC

>vulgaris2

GACCTATGGCGGCATCCAAGAAAATGTCCCATAGAAGAGCTTTCCTCATGATTATCTTTGTGTGGATA  
TGGTCCATTGTTTGGGCTGTGCGCCCCGTCTTCAACTGGGGAGCATACGTCCCTGAAGGTATTCTTAC  
ATCTTGCTCTTTTGATTACCTGTCTACTGATTCTAATACCAGATCTTTTATCTTGTGCATGTACTTCA  
TGGGTTTCATGCTGCCCGTAGTTATCATCGCTTTCTGTTACTTCAACATTGTCATGTCTGTATCCAAC  
CACGAAAAGGAAATGGCTGCCATGGCTAAGAGGTTGAATGCCAAAGAATTGCGTAAGGCACAGGCTGG  
CCAGAGCGCTGAAATGAAACTTGCCAAAATTTCAATGGTAATTATTACCCAATTCATGCTCTCCTGGT  
CTCCATACGCCGTCATCGCTCTTCTTGACAGTTTGGGCCAGCTGAATGGGTTACTCCTTATGCAGCT  
GAATTGCCTGTCCTGTTTGCTAAAGCTTCAGCTATCCACAACCCAATTGTCTACTCTGTTTC

>vulgaris3

GACCTATGGCGGCATCCAAGAAAATGTCCCATAGAAGAGCTTTCCTCATGATTATCTTTGTGTGGATA  
TGGTCCATTGTTTGGGCTGTGCGCCCCGTCTTCAACTGGGGAGCATACGTCCCTGAAGGTATTCTTAC  
ATCTTGCTCTTTTGATTACCTGTCTACTGATTCTAATACCAGATCTTTTATCTTGTGCATGTACTTCA  
TGGGTTTCATGCTGCCCGTAGTTATCATCGCTTTCTGTTACTTCAACATTGTCATGTCTGTATCCAAC  
CACGAAAAGGAAATGGCTGCCATGGCTAAGAGGTTGAATGCCAAAGAATTGCGTAAGGCACAGGCTGG  
CCAGAGCGCTGAAATGAAACTTGCCAAAATTTCAATGGTAATTATTACCCAATTCATGCTCTCCTGGT  
CTCCATACGCCGTCATCGCTCTTCTTGACAGTTTGGGCCAGCTGAATGGGTTACTCCTTATGCAGCT  
GAATTGCCTGTCCTGTTTGCTAAAGCTTCAGCTATCCACAACCCAATTGTCTACTCTGTTTC

>vulgaris4

GACCTATGGCGGCATCCAAGAAAATGTCCCATAGAAGAGCTTTCCTCATGATTATCTTTGTGTGGATA  
TGGTCCATTGTTTGGGCTGTCGGCCCCGTCTTCAACTGGGGAGCATACGTCCCTGAAGGTATTCTTAC  
ATCTTGCTCTTTTGATTACCTGTCTACTGATTCTAATACCAGATCTTTTATCTTGTGCATGTACTTCA  
TGGGTTTCATGCTGCCCGTAGTTATCATCGCTTTCTGTTACTTCAACATTGTCATGTCTGTATCCAAC  
CACGAAAAGGAAATGGCTGCCATGGCTAAGAGGTTGAATGCCAAAGAATTGCGTAAGGCACAGGCTGG  
CCAGAGCGCTGAAATGAACTTGCCAAAATTTCAATGGTAATTATTACCCAATTCATGCTCTCCTGGT  
CTCCATACGCCGTCATCGCTCTTCTTGACAGTTTGGGCCAGCTGAATGGGTTACTCCTTATGCAGCT  
GAATTGCCTGTCCTGTTTGCTAAAGCTTCAGCTATCCACAACCAATTGTCTACTCTGTTTC
